# Supplementary material
Source: ML conference proceedings conference paper supplement (https://openreview.net/forum?id=LHsQSC89Pt)
Supplement: supplementary_material [file STAR_with_supplement.pdf › STAR_with_supplement.pdf]

---

# STaR-Bets: Sequential Target-Recalculating Bets for Tighter Confidence Intervals

---

Anonymous Author(s)

Affiliation

Address

email

## Abstract

1 The construction of confidence intervals for the mean of a bounded random variable  
2 is a classical problem in statistics with numerous applications in machine learn-  
3 ing and virtually all scientific fields. In particular, obtaining the tightest possible  
4 confidence intervals is vital every time the sampling of the random variables is  
5 expensive. The current state-of-the-art method to construct confidence intervals  
6 is by using betting algorithms. This is a very successful approach for deriving  
7 optimal confidence sequences, even matching the rate of law of iterated logarithms.  
8 However, in the fixed horizon setting, these approaches are either sub-optimal  
9 or based on heuristic solutions with strong empirical performance but without a  
10 finite-time guarantee. Hence, no betting-based algorithm guaranteeing the optimal  
11  $\mathcal{O}(\sqrt{\frac{\sigma^2 \log \frac{1}{\delta}}{n}})$  width of the confidence intervals are known. This work bridges this  
12 gap. We propose a betting-based algorithm to compute confidence intervals that  
13 empirically outperforms the competitors. Our betting strategy uses the optimal  
14 strategy in every step (in a certain sense), whereas the standard betting methods  
15 choose a constant strategy in advance. Leveraging this fact results in strict improve-  
16 ments even for classical concentration inequalities, such as the ones of Hoeffding  
17 or Bernstein. Moreover, we also prove that the width of our confidence intervals is  
18 optimal up to an  $1 + o(1)$  factor diminishing with  $n$ .

## 19 1 Introduction

20 Quantifying uncertainty is a cornerstone of statistical inference, and confidence intervals (CIs) remain  
21 one of the most widely used tools for this purpose. Typically constructed within the frequentist  
22 paradigm, a  $(1 - \delta)$ -CI provides a range of plausible values for an unknown parameter, derived from  
23 observed data, with the guarantee that the procedure yields intervals covering the true parameter  
24 value in  $1 - \delta$  proportion of hypothetical repetitions. In particular, in this paper we are interested in  
25 providing CI for the mean of a bounded random variable. So, more formally, after observing  $n$  i.i.d.  
26 samples  $X_1, \dots, X_n$  of a random variable in  $[0, 1]$  with mean  $\mu$ , we want to find  $l_n$  and  $u_n$  such that

$$\mathbb{P}\{\mu \leq u_n\} \geq 1 - \delta/2 \text{ and } \mathbb{P}\{\mu \geq l_n\} \geq 1 - \delta/2. \quad (1)$$

27 Classical methods provide well-established procedures with optimal asymptotically properties, but  
28 poor performance when  $n$  is small.

29 This paper explores an alternative approach to constructing confidence intervals, based on the  
30 framework of game-theoretic probability and sequential betting. In this framework, the algorithm  
31 makes sequential bets on the values of  $X_i - m$ . If  $m$  is close to the true mean  $\mu$ , then the random  
32 variables  $X_i - m$  is approximately zero mean. Now, it is intuitive that no strategy can hope to gain  
33 money betting on a fair random variable and we expect little money betting on a random variable with

mean very close to zero. Conversely, if the algorithm makes enough money, we can infer that  $m$  is far from the true mean  $\mu$ . The above reasoning can be carried out in rigorous way, using the concept of *testing martingales* [17]. In particular, one can show that we can construct the confidence interval as the set of all  $m$  such that the wealth does not reach  $\frac{2}{\delta}$ . In this view, a better betting algorithm results in a tighter confidence interval.

These approaches give state-of-the-art theoretical and empirical results in the time-uniform case. However, they fail short in the finite-sample regime, both in theory and in practice.

**Contributions.** In this paper, we propose a new strategy for betting in the finite-sample regime. We explicitly take into account how many rounds we still have and that by how much we still need to multiply our current wealth to reach the threshold. This give rise to a new family of betting algorithm for the finite-sample setting, the  $\star$ -algorithms (STaR=Sequential Target-Recalculating). We show that this strategy can be used, for example, to immediately improve the confidence intervals calculated through Hoeffding and Bernstein, without losing anything. Moreover, we present a new algorithm, STaR-Bets, that achieve state-of-the-art confidence intervals on a variety of distributions while at the same time provably achieving the theoretically optimal bound.

## 2 Related Work

The literature on how to construct confidence intervals for the mean of a random variable is vast. Classic results like Hoeffding’s [9] and Bernstein’s [3] inequalities require the knowledge of the variance of the random variable (which can always upper bounded for bounded random variables). Later, Maurer and Pontil [11] and Audibert et al. [2] proved that it is possible to prove *empirical* Bernstein’s inequalities, that is, with optimal dependency on the variance but without its prior knowledge. However, these results tend to be loose on small samples because they sacrifice the tightness of the interval with a simple and interpretable formula.

On the other hand, it is possible to design procedures to numerically find the intervals, without having a closed formula. A classic example is the Clopper-Pearson confidence interval [5] for Bernoulli random variables, that is obtained by inverting the Cumulative Distribution Function (CDF) of the binomial distribution. This approach is general, in the sense that it can be applied to any random variable when the CDF is known. However, no optimal solution is known if we do not have prior knowledge of the CDF of the random variable.

An alternative approach is the betting one, proposed by Cover [6] for the finite-sample case and by Shafer and Vovk [16] and Shafer et al. [17] for the time-uniform case, as a general way to perform statistical testing of hypotheses. The first paper to consider an implementable strategy for testing through betting is Hendriks [8]. Later, Jun and Orabona [10] proposed to design the betting algorithms by specifically minimizing the regret w.r.t. a constant betting scheme. Waudby-Smith and Ramdas [19] suggested the use of betting heuristics, motivated by asymptotic analyses and online convex optimization approaches to betting algorithms [13, 7]. Recently, Orabona and Jun [12] have shown that regret-based betting algorithms can recover the optimal law of iterated logarithm too, and achieve state-of-the-art performance for time-uniform confidence intervals. However, these approaches fail to give optimal widths in the finite-sample regime that we consider in this paper.

The problem of achieving the tightest possible confidence interval for random variables for small samples has received a lot of interest in the statistical community. It is enough to point out that even the Clopper-Pearson approach has been considered to be too wasteful, because of the discrete nature of the CDF that does not allow an exact inversion.<sup>1</sup> In this view, sometimes people prefer to use approximate methods, that is, methods that do not guarantee the exact level of confidence  $1 - \delta$ , because they are less conservative [see, e.g., the reviews in 1, 15]. Recently, Phan et al. [14] proposed an approach based on constructing an envelope that contains the CDF of the random variable with high probability. This approach was very promising in the small sample regime, however in Section 6 we will show that our approach is consistently better.

## 3 A Coin-Betting Game

The statistical testing framework we rely on is based on *betting*. In particular, we will set up simple betting games based on the hypothesis we want to test. The outcome of the testing will be linked

<sup>1</sup>This problem has been solved only recently by Voracek [18], by using a randomized procedure.

85 to how much money a betting algorithm does. Hence, we will be interested in designing “optimal”  
86 betting strategies. In the following, we first describe a simple betting game to draw some intuition  
87 about the optimal betting strategies. Then, in Section 4 we formally introduce the testing by betting  
88 framework.

89 We introduce a simple sequential coin betting game in which we bet on the outcomes of a coin. If the  
90 result is Head, we gain the staked amount, otherwise we lose it. The game is as follows: We will bet  
91 for  $n$  rounds, and we win if we multiply our initial wealth by at least a factor of  $k$ . Hence, we are not  
92 interested in how money we make, but only if we pass a certain threshold.

93 Let’s now discuss some possible scenarios, to see how the optimal betting strategy changes.

94 **Scenario 1,  $n = 1, k = 2$ :** It is optimal to bet everything and if we observe Head, we win. Generally,  
95 in the last round we should always bet everything we have.

96 **Scenario 2,  $n = 5, k = 0.9$ :** In this case, it is optimal to not bet anything, and we win.

97 **Scenario 3,  $n = 2, k = \sqrt{2}$ :** Consider the possible outcomes: Heads/Heads, Heads/Tails,  
98 Tails/Heads, Tails/Tails. In the last case we always lose. If we want to win in the Heads/Tails case,  
99 we would need to bet  $\sqrt{2} - 1$ , in which case we reach the desired wealth after observing Heads and  
100 we stop betting. In the case we first observe Tails, then we end up  $\sqrt{2}/2$  money. Then, we recover  
101 Scenario 1 and bet all the money.  
102

103 Before we continue with more general scenarios, we make some (perhaps obvious) observations.  
104 These considerations will be useful when we will link betting strategies to the proof of standard  
105 concentration inequalities, such as Hoeffding’s or Bernstein’s.

- 106 • The original values of  $n, k$  do not matter. Instead, what matter are how these quantities  
107 change over time, that is, how many rounds are left and how many times we still need to  
108 multiply our wealth.
- 109 • When we hit the required wealth, we should stop betting.
- 110 • For a given  $n$ , the smaller  $k$  is, the less we need to bet. Conversely, if  $k$  is large, we need to  
111 bet aggressively.
- 112 • We should always finish the game by either going bankrupt or by hitting the target.

113 Let’s now consider more complex scenarios.

114 **Scenario 4,  $n, k \approx 1 + 2^{-n}$ :** In this case, our bets would be  $\approx 2^{-n}$ , so that we win as soon as we  
115 observe a single heads outcome.

116 **Scenario 5,  $n, k \approx 2^n$ :** In this case, our bets would be  $\approx 1$  in general, as we need to roughly double  
117 our wealth every round and hope for lots of heads.

118 **Scenario 6,  $n, k$ :** In the general case, we bet  $\approx \sqrt{\log k/n}$ . In this way, if we observe  $H$  heads and  
119  $T$  tails, the wealth would be roughly

$$\left(1 + \sqrt{\frac{\log k}{n}}\right)^H \left(1 - \sqrt{\frac{\log k}{n}}\right)^T \approx \left(1 - \frac{\log k}{n}\right)^T \left(1 + \sqrt{\frac{\log k}{n}}\right)^{H-T} \gtrsim k,$$

120 as long as  $H - T \gtrsim \sqrt{n \log k}$ .

121 Let us examine the even  $H - T \gtrsim \sqrt{n \log k}$ : If the coin is fair, the event  $H - T \gtrsim \sqrt{n \log k}$ —in  
122 which case we successfully multiplied our wealth by a factor  $k$ —happens with probability at most  
123  $\approx \frac{1}{k}$ , and it is not just a coincidence. So, if we multiply out wealth by factor of  $k$ , we can rule out the  
124 possibility that the game is fair at confidence level  $1 - \frac{1}{k}$ . This statement is the cornerstone of the  
125 testing by betting framework and we will make it formal and prove it in the next subsection.

## 126 4 Testing and Confidence Intervals by Betting

127 Before describing this method in detail, we introduce the precise mathematical framework. We start  
128 with the definition of test processes: Sequences of random variables modeling fair<sup>2</sup> betting games. In  
129 these games, our wealth is always non-negative and stays constant (or decreases) in expectation.

<sup>2</sup>We allow for the game to be unfair against us.

130 **Definition 1** (Test process). Let  $W_0, W_1, \dots, W_n$  be a sequence of non-negative random variables.  
 131 We call it a test process if  $\mathbb{E}[W_0] = 1$  and  $\mathbb{E}[W_{i+1} \mid M_0, \dots, W_i] \leq W_i$ , for  $i \geq 0$ .

132 Next, Markov's inequality quantifies how unlikely it is for a test process to grow large.

133 **Proposition 1** (Markov's inequality). Let  $W_0, W_1, \dots, W_n$  be a test process. For any  $\delta \in (0, 1)$  it  
 134 holds that  $\mathbb{P}\{W_n \geq \frac{1}{\delta}\} \leq \delta$ .

135 *Proof.*  $\mathbb{E}[W_n] = \mathbb{E}[W_0] = 1$  and  $W_n > 0$ . Then,  $\mathbf{1}_{W_n \geq \frac{1}{\delta}} \leq \delta W_n$  and take expectation.  $\square$

136 Finally, we introduce the betting-based confidence intervals.

137 **Theorem 2.** A confidence interval obtained within the following scheme has coverage at least  $1 - \delta$ .

| Confidence interval by betting |                                                                                                                                                                               |
|--------------------------------|-------------------------------------------------------------------------------------------------------------------------------------------------------------------------------|
| <b>Objective:</b>              | Construct a $(1 - \delta)$ -confidence interval for $\mathbb{E}[X]$ from $X_1, \dots, X_n \in [0, 1]$ .                                                                       |
| <b>Procedure:</b>              | For each $m \in [0, 1]$ , form a null hypothesis $H_0(m) : \mathbb{E}[X] = m$ .<br>Let $S = \{m \mid H_0(m) \text{ not rejected by betting at } 1 - \delta \text{ level}\}$ . |
| <b>Outcome:</b>                | Interval $I$ such that $S \subset I$ , then $I$ is a $(1 - \delta)$ -CI for $\mathbb{E}[X]$ .                                                                                 |
| Testing by betting             |                                                                                                                                                                               |
| <b>Objective:</b>              | Test the null hypothesis $H_0$ on $X_1, \dots, X_n$ at confidence level $1 - \delta$ .                                                                                        |
| <b>Procedure:</b>              | Define $W_1, \dots, W_n$ such that it is a test process under $H_0$ .                                                                                                         |
| <b>Outcome:</b>                | If $W_n \geq \frac{1}{\delta}$ , reject $H_0$ at confidence level $1 - \delta$ .                                                                                              |

138 *Proof.* If the true mean  $\mu$  is not contained in the resulting confidence interval, the null hypothesis  
 139  $H_0(\mu) : \mathbb{E}[X] = \mu$  was rejected by betting. The corresponding sequence  $W_1^\mu, \dots, W_n^\mu$  is a test  
 140 process and because it was rejected, we have  $W_n^\mu \geq \frac{1}{\delta}$ . But this happens with probability at most  
 141  $1 - \delta$  by Markov's inequality.  $\square$

142 **Test process under a null hypothesis:** A popular process (optimal in a certain sense [4]) for testing  
 143 a null hypothesis  $H_0(m) : \mu = m$  for a given  $m \in [0, 1]$  is:

$$W_0^m = 1 \quad W_i^m = W_{i-1}^m (1 + \ell_i \cdot (X_i - m)), \text{ for } i \geq 1, \quad (2)$$

144 where  $\ell_i \in \left[\frac{1}{m-1}, \frac{1}{m}\right]$  is our betting strategy (so is of course independent of  $X_{\geq i}$  but can depend  
 145 on  $X_{< i}$  and the other known quantities  $m, n, \delta$ ). Under the null hypothesis, we have  $\mathbb{E}[W_{i+1} \mid$   
 146  $W_1, \dots, W_i] = \mathbb{E}[W_i]$ . Additionally, by the bound on  $\ell_i$ , we have the non-negativity, and so  
 147  $\{W_i^m\}_{i=1}^n$  is a test process. We have already used this test process in the coin betting example, if we  
 148 identify Heads (resp. Tails) with 1 (resp. 0) and set  $m = \frac{1}{2}$ , then  $\ell_i/2$  is the fraction of money we bet.

149 Theorem 2 provides a scheme on how to construct confidence intervals, by testing all the possible  
 150 values  $m$  of the expectation of the random variable. However, such approach would require us to test  
 151 a continuum of hypotheses. So, there are two standard ways to proceed:

- 152 1. **Root finding:** If the function  $m \mapsto W_n^m$  has a simple structure (e.g., quasi-convex), then the  
 153 set of non-rejected mean candidates form an interval and we can easily find its end points by  
 154 numerical methods, or even in a closed form.
- 155 2. **Discretization:** Discretize the interval  $[0, 1]$  into  $G$  grid points  $m_1 < m_2 < \dots < m_G$ .  
 156 Use the same betting strategies for all  $m$  in  $m_i \leq m \leq m_{i+1}$  and all  $1 \leq i \leq G - 1$ . In this  
 157 case, the function  $m \mapsto W_n^m$  is monotonous in between the grid points, and so evaluating  
 158  $m \mapsto W_i^m$  only at grid-points provide sufficient information for the construction of the  
 159 confidence interval.

#### 160 4.1 Hoeffding and Sequential Target-Recalculating (✱) Bets

161 In this section, we recover the classical confidence intervals by Hoeffding's inequality within the  
 162 betting framework using Theorem 2—recovering Bernstein's intervals follows the same steps, so it is  
 163 deferred to the Appendix. Our plan is to show that the Hoeffding betting strategy violates the design

---

**Algorithm 1** Hoeffding testing

---

**Require:** i.i.d.  $X_1, \dots, X_n \in [0, 1]$ **Require:**  $\delta > 0, m \in [0, 1], n$  $W \leftarrow 1$ **for**  $t = 1 \dots n$  **do** $\ell^H \leftarrow \sqrt{8 (\log \frac{1}{\delta}) / n}$  $W \leftarrow W \exp \left( \ell^H \cdot (X_t - m) - \frac{(\ell^H)^2}{8} \right)$ **if**  $W \geq \frac{1}{\delta}$  **then**Reject  $H_0(m) : m = \mathbb{E}[X]$ 

---

---

**Algorithm 2**  $\star$ -Hoeffding testing

---

**Require:** i.i.d.  $X_1, \dots, X_n \in [0, 1]$ **Require:**  $\delta > 0, m \in [0, 1], n$  $W \leftarrow 1$ **for**  $t = 1 \dots n$  **do** $\ell_\star^H \leftarrow \sqrt{8 (\log \frac{1}{W\delta})_+ / (n-t+1)}$  $W \leftarrow W \exp \left( \ell_\star^H \cdot (X_t - m) - \frac{(\ell_\star^H)^2}{8} \right)$ **if**  $W \geq \frac{1}{\delta}$  **then**Reject  $H_0(m) : m = \mathbb{E}[X]$ 

---

principles we have discussed earlier in this section. Hence, we can fix those problems and obtain tighter confidence intervals, essentially for free. More generally, we introduce  $\star$ -betting strategies as the ones that have the better design principles.

We will use the following lemma to derive the test processes.

**Lemma 3** (Hoeffding's lemma). *Let  $X \in [0, 1]$  with mean  $\mu = \mathbb{E}[X]$ , then*

$$\mathbb{E} \left[ e^{\ell \cdot (X - \mu) - \frac{\ell^2}{8}} \right] \leq 1, \quad \forall \ell \in \mathbb{R}. \quad (3)$$

Furthermore, the sequence  $W_0 = 1, W_{i+1} = W_i \exp \left( \ell \cdot (X_i - \mu) - \frac{\ell^2}{8} \right)$  for  $i \geq 0$  is a test process.

We compare the testing-by-betting algorithms. The standard Hoeffding test in Algorithm 1, and our improved,  $\star$ -Hoeffding test in Algorithm 2. We observe that the constant betting of Algorithm 1 violates our desiderata for a good betting algorithm. Concretely, it may happen that at some point  $W \geq \frac{1}{\delta}$ , but we keep betting and end up with  $W \leq \frac{1}{\delta}$ . Additionally, it does not adapt to the current situation of how much do we need to increase  $W$  and in how many rounds. In particular, the terms  $n$  and  $\log \frac{1}{\delta}$  defining the bet become irrelevant as  $t$  increases. Instead, as we said, the only important quantities are i)  $\frac{1}{\delta W}$ : how much times we need to multiply our wealth and ii)  $n - t$ : the number of remaining rounds. This motivates the following definition.

We call a betting algorithm for a test process  $\{W_t\}_{t=1}^n$  a  $\star$ -algorithm if it uses the quantities the  $\log \frac{1}{W_t \delta}$  and  $n - t$  to compute the bet at time  $t$ .

As an example, we can immediately generate the  $\star$  version of the Hoeffding algorithm in Algorithm 2 and prove that it is never worse than the original algorithm.

**Proposition 4.** *Let  $m \in [0, 1]$ . Whenever Algorithm 1 rejects the null hypothesis  $H_0(m) : m = \mathbb{E}[X]$ , then so does Algorithm 2 if they share the realizations  $X_t, 1 \leq t \leq n$ .*

*Proof.* Let  $\mathcal{C} = \{\lambda : \lambda \sum_{i=1}^n (X_i - m) - n\lambda^2/8 \geq \log \frac{1}{\delta}\}$ . Consider Algorithm 1 and we first show that

$$\ell^H = \arg \min_{\lambda \in \mathcal{C}} \sum_{i=1}^n X_i.$$

We rewrite the constraint as  $\sum_{i=1}^n X_i \geq nm + \log \frac{1}{\delta} / \lambda + n\lambda/8$ , so the solution is  $\lambda = \sqrt{8 \log \frac{1}{\delta} / n}$ .

Now, consider Algorithm 2. By the same argument,  $\ell_\star^H$  at time  $t$  is minimizing  $\sum_{i=t}^n X_i$  under the constraint that the null hypothesis is rejected. Consequently, the required  $\sum_{i=1}^n X_i$  for Algorithm 2 is initially the same as for Algorithm 1, but it decreases whenever  $\ell_\star^H$  changes with respect to the previous iteration.  $\square$

**Corollary 5.** *Consider generating confidence intervals using Theorem 2 and a betting algorithm. The confidence intervals given by the betting Algorithm 2 are not wider than the confidence intervals by Algorithm 1, all other things being equal. Moreover, there are cases when Algorithm 2 produces strictly smaller confidence intervals.*

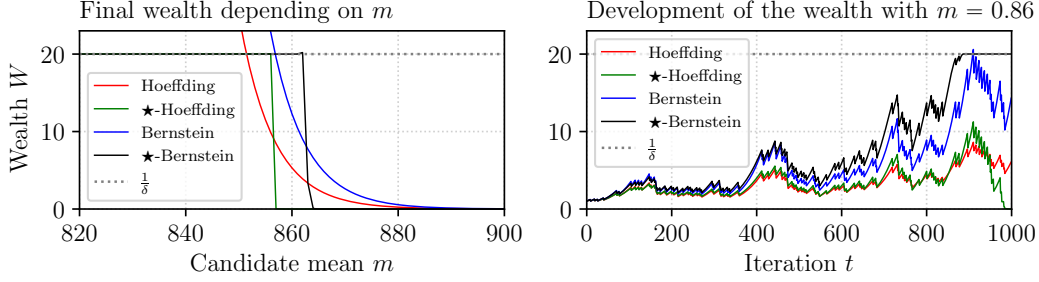

Figure 1: Comparison of the Algorithms 1,2, 5, and 6 with  $\delta = 0.05$  on 1000 realizations of the Bernoulli random variable with mean 0.9. (L): We show the final value of  $W$  depending on the choice of  $m$  for the algorithms. The vanilla versions have exponential dependency on  $m$ , while the  $\star$  versions virtually always end up with  $W \in \{0, \frac{1}{\delta}\}$ . Additionally, we can confirm that the  $\star$  versions reject the null hypothesis for more values of  $m$ . (R): Here we show the evolution of  $W$  throughout the runs of the algorithms for  $m = 0.85$ . We can see that the Bernstein's testing algorithm already achieved the required wealth, but later lost it, unlike  $\star$ -Bernstein's testing which stopped betting after reaching it. We can also see that towards the end,  $\star$ -Hoeffding betting started betting very aggressively in order to have a chance to reach the desired wealth.

Remark 6. Many popular confidence intervals including Hoeffding's, Bernstein's, and Bennet's can benefit from  $\star$  betting. A standard way to derive concentration inequalities is to bound the cumulant generating function. We have seen this in Hoeffding's inequality with  $\mathbb{E}[\exp(\ell \cdot (X - \mu))] \leq \exp(\ell^2/8)$ , but in general we get  $\mathbb{E}[\exp(\ell \cdot (X - \mu))] \leq f(\ell)$ . Then,  $\ell$  is selected to minimize  $\sum_{i=1}^n X_i$  under the condition that  $\ell \sum_{i=1}^n (X_i - m) - \log f(\ell) \geq \log \frac{1}{\delta}$ , which is precisely the reason why  $\star$  betting outperforms standard betting in Proposition 4. We demonstrate this experimentally in Figure 1.

We observe that  $\star$  algorithms usually end with either 0 or  $\frac{1}{\delta}$  wealth. This is a natural consequence of the adaptiveness, as we described in Figure 1 from both sides - if  $\star$  algorithm reaches the target, it stops betting. And on the other hand, if the target is not reached yet, the bets become more and more aggressive, often resulting one bankruptcy. This is not a bad property. If we want to design confidence intervals with exact coverage  $1 - \delta$ , the following proposition shows that it is actually necessary.

**Proposition 7.** Consider the process  $W_i = W_{i-1}(1 + \ell_i \cdot (X_i - \mu))$  with  $W_0 = 1$  and an algorithm for selecting bets  $\ell_i$ . If the algorithm always finishes with  $W_n \in \{0, \frac{1}{\delta}\}$ , then the algorithm falsely rejects the hypothesis  $H_0(\mu) : \mu = \mu$  at confidence level  $1 - \delta$  with probability precisely  $1 - \delta$ .

*Proof.* By construction,  $\mathbb{E}[W_n] = 1$ . Let the algorithm halt with  $W_n = \frac{1}{\delta}$  with probability  $p$ , then  $\mathbb{E}[W_n] = \frac{p}{\delta}$ , yielding  $p = \delta$  as required.  $\square$

## 5 STaR-Bets Algorithm

In the previous section, we have described the key concept of  $\star$ -betting that can be implemented within the majority of common (finite time) betting schemes. It remains to choose a good betting scheme. So, here will introduce our new algorithm: STaR-Bets. Now, we will present an informal reasoning to derive a first version of our betting algorithm. Then, we prove formally that it produces intervals with the optimal width.

Let  $X_1, \dots, X_n \in [0, 1]$  be an i.i.d. sample of a random variable  $X$  for which we aim to find a one-sided interval for the mean parameter. In the following, we also assume that  $n \gg \log \frac{1}{\delta}$ , that is, our sample is large enough. This is not a restrictive assumption. If it is violated, then the optimal confidence interval has width  $\approx 1$  for a general distribution on  $[0, 1]$  and we cannot hope to have a short interval anyway.

223 We use the processes from (2) of the form  $W_{i=1} = W_i(1 + \ell(X_i - m))$  to refute the hypothesis  
 224  $m = \mathbb{E}[X]$ . So, we construct a betting strategy that aims at achieving at least  $\frac{1}{\delta}$  wealth after  $n$  rounds.  
 225 First, we approximate the logarithm of the final wealth using a second-order Taylor expansion:

$$\sum_{i=1}^n \log(1 + \ell_i \cdot (X_i - m)) \approx \sum_{i=1}^n \left( \ell_i \cdot (X_i - m) - \frac{\ell_i^2}{2} \cdot (X_i - m)^2 \right). \quad (4)$$

226 For the moment, we will assume that this is a good approximation, but briefly we will motivate it  
 227 more formally.

228 Define  $S \triangleq \sum_{i=1}^n (X_i - m)$  and  $V \triangleq \sum_{i=1}^n (X_i - m)^2$ . From the r.h.s. of (4), the constant bet  $\ell^*$   
 229 maximizing the approximate wealth is

$$\ell^* \triangleq \arg \max_{\ell} \ell S - \frac{\ell^2}{2} V = \frac{S}{V} \Rightarrow \max_{\ell} \ell S - \frac{\ell^2}{2} V = \frac{(\ell^*)^2}{2} V. \quad (5)$$

230 A reasonable approach is to try to estimate  $\ell^*$  over time, in order to achieve a wealth close this the  
 231 one in (5). This is roughly the approach followed in previous work [see, e.g., 7]. Instead, here we  
 232 follow the approach suggested in Waudby-Smith and Ramdas [19]: We are only interested in the case  
 233 where the (approximate) log-wealth reaches  $\log \frac{1}{\delta}$ . In other words, the outcome of the betting game  
 234 is binary: We either reach the desired log-wealth for the candidate of the mean,  $m$ , and we reject the  
 235 null hypothesis  $H_0(m) : \mathbb{E}[X] = m$ , or we fail to do so. This means that we want

$$\frac{(\ell^*)^2}{2} V = \log \frac{1}{\delta} \Leftrightarrow |\ell^*| = \sqrt{\frac{2 \log \frac{1}{\delta}}{V}}.$$

236 Estimating  $V$  online, Waudby-Smith and Ramdas [19] proved that this strategy will give asymptoti-  
 237 cally optimal confidence intervals almost surely. However, we are aiming for a finite-time guarantee,  
 238 which requires a completely different angle of attack.

239 First of all, it might not be immediately apparent why we expressed (5) as function of  $V$  only, while  
 240 we could also get an  $S$  term. The reason is that this is an easier quantity to estimate: Estimating  
 241  $\frac{V}{n} \approx \mathbb{E}[(X - m)^2] \in \Theta(1)$  is easier than estimating  $\frac{S}{n} \approx \mathbb{E}[X - m] \in \Theta(\frac{1}{\sqrt{n}})$  in the terms of  
 242 relative error. Relative error is relevant because if we overestimate  $\ell^*$  by a factor of 2, then we would  
 243 end up with 0 (approximated) log-wealth.

244 Also, observe that  $\ell^* \in \Theta(\sqrt{\log \frac{1}{\delta}/n})$  which justifies the Taylor approximation in (4). Indeed, we  
 245 aim to approximate  $\ell^*$  and  $|X_i - m| \leq 1$ , so the error of the Taylor approximation is

$$n \cdot \mathcal{O} \left( \left( \sqrt{\frac{\log \frac{1}{\delta}}{n}} \right)^3 \right) = \mathcal{O} \left( \log \frac{1}{\delta} \sqrt{\frac{\log \frac{1}{\delta}}{n}} \right).$$

246 This error is of an order smaller than  $\log \frac{1}{\delta}$  as long as  $n \gg \log \frac{1}{\delta}$ , as we have assumed. Recalling our  
 247 goal of achieving a log-wealth of  $\log \frac{1}{\delta}$ , this means that the Taylor approximation is sufficiently good.

248 Let us now examine the approximate length of the confidence interval consisting of candidate means  
 249  $m$  for which we did not reach log-wealth  $\log \frac{1}{\delta}$ :

$$\ell^* S - \frac{\ell^{*2}}{2} V \leq \log \frac{1}{\delta} \implies S \sqrt{\frac{2 \log \frac{1}{\delta}}{V}} \leq 2 \log \frac{1}{\delta} \implies S \leq \sqrt{2V \log \frac{1}{\delta}}. \quad (6)$$

250 We can further approximate  $V \approx \mathbb{E}[V] = n\mathbb{V}[X] + \mathbb{E}[S]^2/n \approx n\mathbb{V}[X]$ , since  $n\mathbb{V}[X] \in \Theta(n)$ ,  
 251 while  $\mathbb{E}[S]^2/n \in \Theta(1)$ , then the bound from (6) matches the width from the Bernstein's inequality,  
 252 which is the one of a Normal approximation and thus cannot be improved.

253 The only missing ingredient is how to estimate  $V$  over time. Recalling that we aim for a low relative  
 254 error, after seeing  $t$  outcomes we will use the estimator  $V/n \approx \frac{\sum_{i=1}^t (X_i - m)^2}{t} + \frac{n \log \frac{1}{\alpha}}{t^2}$ , where the  
 255 second term is carefully constructed to guarantee that the estimate has a small relative error with high  
 256 probability (depending on  $\alpha$ ) uniformly over  $m$  and  $1 \leq t \leq n$ .

257 The final algorithm is shown in Algorithm 3, where we run the above betting procedure for a possible  
 258 values of  $m \in [0, 1]$  and reject them as mean candidates if the log-wealth is at least  $\log \frac{1}{\delta}$ .

---

**Algorithm 3** Testing with Bets

---

**Require:** i.i.d.  $X_1, \dots, X_n \in [0, 1]$ **Require:**  $\alpha, \delta > 0, m \in [0, 1], n$  $V \leftarrow 0, \lg W \leftarrow 0$ **for**  $1 \leq t \leq n$  **do** $v \leftarrow \left( V/(t-1) + \frac{10 \log \frac{8}{\alpha} n}{(t-1)^2} \right) \wedge 1$  $\ell \leftarrow \sqrt{2 \log \frac{1}{\delta} / (nv)} \wedge 1$  $\lg W \leftarrow \lg W + \log(1 + \ell(X_i - m))$  $V \leftarrow V + (X_i - m)^2$ **if**  $\lg W \geq \log \frac{1}{\delta}$  **then** Rejected

---

---

**Algorithm 4** Testing with  $\star$ -Bets

---

**Require:** i.i.d.  $X_1, \dots, X_n \in [0, 1]$ **Require:**  $\alpha, \delta > 0, m \in [0, 1], n$  $V \leftarrow 0, \lg W \leftarrow 0$ **for**  $1 \leq t \leq n$  **do** $v \leftarrow \left( V/(t-1) + \frac{10 \log \frac{8}{\alpha} n}{(t-1)^2} \right) \wedge 1$  $\ell \leftarrow \sqrt{2(\log \frac{1}{\delta} - \lg W) / ((n-t+1)v)} \wedge 1$  $\lg W \leftarrow \lg W + \log(1 + \ell(X_i - m))$  $V \leftarrow V + (X_i - m)^2$ **if**  $\lg W \geq \log \frac{1}{\delta}$  **then** Rejected

---

**Theorem 8.** For every random variable  $X \in [0, 1]$  with mean  $\mu$  and variance  $\sigma^2 > 0$ , every  $\alpha, \delta \in (0, 1)$ , and  $c > 0$ , there is  $n_0$  depending on  $\alpha, \delta, \sigma^2, c$ , such that for all  $n \geq n_0$ , Algorithm 3 rejects at confidence level  $1 - \delta$  every  $m$  satisfying

$$m \leq \frac{\sum_{i=1}^n X_i}{n} - \sigma \sqrt{\frac{(2+c) \log \frac{1}{\delta}}{n}}. \quad (7)$$

with probability at least  $1 - \alpha$ .

The proof is in Appendix A.

**Corollary 9.** Algorithm 3 can be used in the framework of Theorem 2 (using the discretization technique for constructing intervals) to construct confidence intervals of the width up to a  $1 + o(1)$  factor diminishing with  $n$ .

Our proposed algorithm is  $\star$ -bet in Algorithm 4, the  $\star$  version of just derived Algorithm 3. We discuss the implementation details in Appendix D.

## 6 Experiments

Now we provide some experiments suggesting that  $\star$ -bet yields shorter confidence intervals than alternative methods. Here, we provide a “teaser” of our experiments, while the extensive experimental evaluation is in Appendix C. We identified several methods as our direct or indirect competitors and will briefly discuss them.

- Confidence interval derived from the T-test. This is a widely used confidence interval in practice, but it does not have guaranteed coverage in general. We show that our  $\star$ -bet algorithm is competitive with T-test and has guaranteed coverage  $X \in [0, 1]$ .
- Clopper-Pearson [5] is the best deterministic confidence interval for a binomial sample (sum of Bernoulli random variables). Nevertheless,  $\star$ -bet often produces shorter intervals.
- Randomized Clopper-Pearson [18] is the optimal binomial confidence interval.  $\star$ -bet is still competitive.
- Hedged-CI [19] is a confidence interval based on betting and currently the best known algorithm for constructing confidence intervals. It is very similar to our vanilla testing algorithm 3 with comparable performance. The difference lies in the fact that we estimate  $\mathbb{E}[(X - m)^2]$ , while [19] estimates  $\mathbb{E}[(X - \mu)^2]$ . However, our  $\star$ -bet is significantly stronger.
- Hoeffding’s inequality and empirical Bernstein bound are the standard ways to construct confidence intervals, and so we include them in the experiments. Empirical Bernstein bound is usually weak because of the additive terms. Hoeffding’s inequality is generally weak, but when  $\mathbb{V}[X] \approx \frac{1}{2}$ , it is competitive with some of the other methods but not with  $\star$ -bet.
- Method<sup>3</sup> of Phan et al. [14] was state of the art at the time of introduction, aiming at short intervals for very small (10 – 50) sample sizes. We show that  $\star$ -bet is stronger even in this regime. Furthermore, this method does not scale well to large samples.

<sup>3</sup>It is called practical mean bounds for small samples, so we abbreviate it as PMBSS



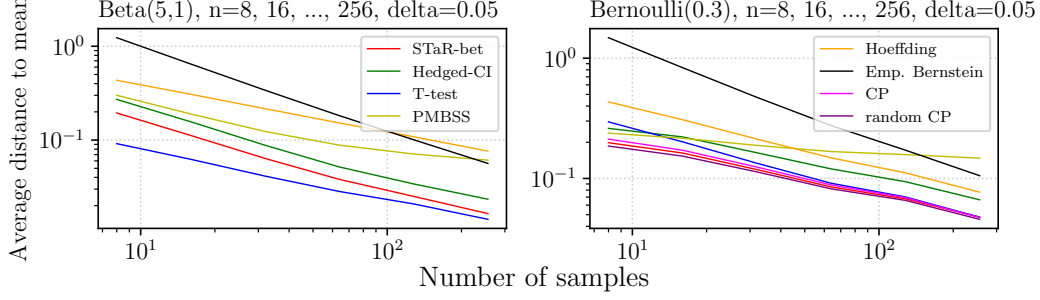

Figure 2: We directly compare the widths of the confidence intervals. Note the log – log scale. For all the methods and every  $n = 8, 16, \dots, 256$ , we have estimated the mean  $1000 \times$  of a fresh realization of the corresponding random variable and plotted the mean distance to the mean. (L): When estimating the mean of beta distribution, we observe that that with increasing  $n$ , we are getting closer to the performance of T-test. (R): When estimating Bernoulli mean, the performance of  $\star$ -bet is very similar to the specialized optimal methods.

First, we perform several experiments with Beta and Bernoulli distribution to quickly assess the competing methods. We show in Figure 2 how do the widths of the confidence intervals evolve as we increase  $n$  and conclude, that from our direct competitors, Waudby-Smith and Ramdas [19] is the strongest one, thus we use it in our further experiments in Appendix C

Now we present in Figure 3 some experiments with Bernoulli distributions. In that case, there are specialized methods known to be optimal and we can compete with them, even when the setting is unfair for us.

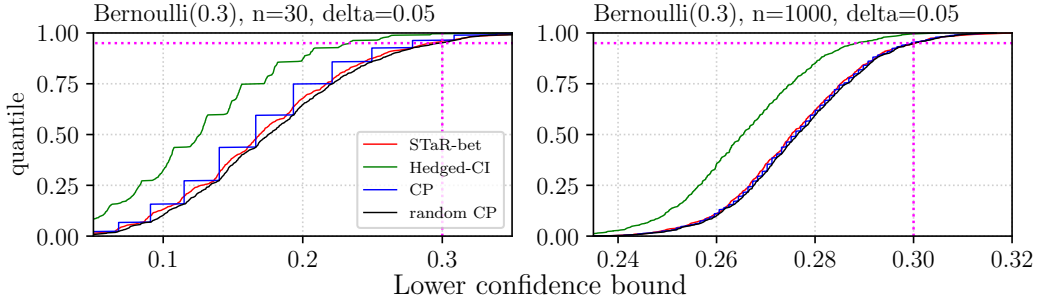

Figure 3: CDF figure: When a curve corresponding to a method passes through a point  $(x, y)$ , it means that the  $y$ -fraction (of 1000 repetitions) of lower confidence bounds was smaller than  $x$ . The vertical magenta line shows the mean position, and the vertical one shows the  $1 - \delta$  quantile. We can see that in both cases,  $\star$ -bet passes through the intersection, implying that the coverage is  $\approx 1 - \delta$ . We estimated the mean of a Bernoulli distribution using 30 (L) and 1000 (R) samples. We observe that in the low sample regime,  $\star$ -bet is mildly worse than the unbeatable randomized Clopper-Pearson, arguably better than standard Clopper-Pearson, and significantly better than Hedging of [19]. In the regime of larger samples, we can see that  $\star$ -bet stays very close to the optimal intervals, while the competitor is still significantly worse.

**Conclusions** We have introduced  $\star$ -technique in the construction of confidence intervals that directly (strictly) improves many betting algorithms and concentration inequalities, such as the ones of Hoeffding and Bernstein. Then, we have proposed a new betting algorithm for which he have proven that it can construct confidence intervals of the optimal length up to diminishing factor. While the  $\star$ -technique is powerful in experiments, we have only proven that it never hurts (certain class of algorithms) and that it usually helps. How much does it helps remains an open theoretical question.

## References

- [1] A. Agresti and B. A. Coull. Approximate is better than “exact” for interval estimation of binomial proportions. *The American Statistician*, 52(2):119–126, 1998.
- [2] J.-Y. Audibert, R. Munos, and C. Szepesvári. Variance estimates and exploration function in multi-armed bandit. In *CERTIS Research Report 07–31*. 2007.
- [3] S. Bernstein. On a modification of Chebyshev’s inequality and of the error formula of Laplace. *Ann. Sci. Inst. Sav. Ukraine, Sect. Math*, 1(4):38–49, 1924.
- [4] Eugenio Clerico. On the optimality of coin-betting for mean estimation. *arXiv preprint arXiv:2412.02640*, 2024.
- [5] C. J. Clopper and E. S. Pearson. The use of confidence or fiducial limits illustrated in the case of the binomial. *Biometrika*, 26(4):404–413, 1934.
- [6] T. M Cover. Universal gambling schemes and the complexity measures of Kolmogorov and Chaitin. Technical Report 12, Department of Statistics, Stanford University, 1974. URL <https://purl.stanford.edu/js411qm9805>.
- [7] A. Cutkosky and F. Orabona. Black-box reductions for parameter-free online learning in Banach spaces. In *Proc. of the Conference on Learning Theory (COLT)*, 2018.
- [8] H. Hendriks. Test martingales for bounded random variables. *arXiv preprint arXiv:2109.08923*, 2018.
- [9] W. Hoeffding. Probability inequalities for sums of bounded random variables. *Journal of the American Statistical Association*, 58(301):13–30, 1963.
- [10] K.-S. Jun and F. Orabona. Parameter-free online convex optimization with sub-exponential noise. In *Proc. of the Conference on Learning Theory (COLT)*, 2019.
- [11] A. Maurer and M. Pontil. Empirical Bernstein bounds and sample variance penalization. In *Proc. of the Conference on Learning Theory*, 2009.
- [12] F. Orabona and K.-S. Jun. Tight concentrations and confidence sequences from the regret of universal portfolio. *IEEE Trans. Inf. Theory*, 70(1):436–455, 2024.
- [13] F. Orabona and D. Pál. Coin betting and parameter-free online learning. In D. D. Lee, M. Sugiyama, U. V. Luxburg, I. Guyon, and R. Garnett, editors, *Advances in Neural Information Processing Systems 29*, pages 577–585. Curran Associates, Inc., 2016.
- [14] M. Phan, P. Thomas, and E. Learned-Miller. Towards practical mean bounds for small samples. In *International Conference on Machine Learning*, pages 8567–8576. PMLR, 2021.
- [15] M. F. Schilling and J. A. Doi. A coverage probability approach to finding an optimal binomial confidence procedure. *The American Statistician*, 68(3):133–145, 2014.
- [16] G. Shafer and V. Vovk. *Probability and finance: it’s only a game!* John Wiley & Sons, 2001.
- [17] G. Shafer, A. Shen, N. Vereshchagin, and V. Vovk. Test martingales, Bayes factors and  $p$ -values. *Statistical Science*, 26(1):84–101, 2011.
- [18] V. Voracek. Treatment of statistical estimation problems in randomized smoothing for adversarial robustness. *Advances in Neural Information Processing Systems*, 37:133464–133486, 2024.
- [19] I. Waudby-Smith and A. Ramdas. Estimating means of bounded random variables by betting. *Journal of the Royal Statistical Society Series B: Statistical Methodology*, 86(1):1–27, 2024.

## A Proof of Theorem 8

Before we prove the theorem, we introduce several propositions we use in the sequel. We start with a (time uniform) version of Bennett's inequality:

**Proposition 10** (part of Lemma 1 of [2]). *Let  $X_1, \dots, X_n \leq b$  be i.i.d. real-valued random variables and let  $b' = b - \mathbb{E}[X]$ . For any  $\delta \in (0, 1)$ , simultaneously for all  $1 \leq t \leq n$ , we have*

$$\sum_{i=1}^t (X_i - \mathbb{E}[X]) \leq \sqrt{2n\mathbb{V}[X] \log \frac{1}{\delta}} + \frac{b'}{3} \log \frac{1}{\delta}.$$

More generally, let  $X_1, \dots, X_n < b$  be a sequence of martingale differences (i.e.,  $\mathbb{E}[X_i \mid X_1, \dots, X_{i-1}] = 0$  for all  $i$ ). Let  $nV = \sum_{i=1}^n \mathbb{V}[X_i \mid X_1, \dots, X_{i-1}]$ . For any  $\delta \in (0, 1)$ , simultaneously for all  $1 \leq t \leq n$ , we have

$$\sum_{i=1}^t X_i \leq \sqrt{2nV \log \frac{1}{\delta}} + \frac{b}{3} \log \frac{1}{\delta}.$$

**Remark 11.** The first part of the proposition is implied by the second one and is the standard Freedman's inequality up to a factor of 2 in the last term. This factor was removed in [2], but the result was stated for an i.i.d. sequence (the first part of the lemma) and not for martingale differences. However, the proof of [2] applies also to the second part.

Now, we use it to bound the deviation of our second moment estimator from the mean for all  $m$  and  $t$  simultaneously with high probability.

**Proposition 12.** *Let  $X_1, \dots, X_n \in [0, 1]$  be i.i.d. random variables with variance  $\mathbb{V}[x] = \sigma^2$ . For any  $\alpha \in (0, 1)$ , simultaneously for all  $1 \leq t \leq n$  and all  $m \in [0, 1]$  we have all the following inequalities with probability at least  $1 - \alpha$ :*

$$\begin{aligned} \frac{\sum_{i=1}^t (X_i - m)^2}{t} + \frac{10n \log \frac{4}{\alpha}}{t^2} &\leq \mathbb{E}[(X - m)^2] \left( 1 + \sqrt{\frac{18n \log \frac{4}{\alpha}}{t^2 \mathbb{E}[(X - m)^2]} + \frac{11n \log \frac{4}{\alpha}}{t^2 \mathbb{E}[(X - m)^2]}} \right), \\ \frac{\sum_{i=1}^t (X_i - m)^2}{t} + \frac{10n \log \frac{4}{\alpha}}{t^2} &\geq \mathbb{E}[(X - m)^2] \overbrace{\left( 1 - \sqrt{\frac{18n \log \frac{4}{\alpha}}{t^2 \mathbb{E}[(X - m)^2]} + \frac{9n \log \frac{4}{\alpha}}{t^2 \mathbb{E}[(X - m)^2]}} \right)}^{\geq 0.5}, \\ \left| \frac{\sum_{i=1}^t X_i^2}{t} - \mathbb{E}[X^2] \right| &\leq \sqrt{\frac{2n\sigma^2 \log \frac{4}{\alpha}}{t^2}} + \frac{\log \frac{4}{\alpha}}{3t}, \\ \left| \frac{\sum_{i=1}^t X_i}{t} - \mathbb{E}[X] \right| &\leq \sqrt{\frac{2n\sigma^2 \log \frac{4}{\alpha}}{t^2}} + \frac{\log \frac{4}{\alpha}}{3t}. \end{aligned} \tag{8}$$

*Proof.* We use Proposition 10 on random variables  $X, -X, X^2, -X^2$  and union bound, using the fact that  $\mathbb{V}[X^2] \leq \mathbb{V}[X]$  as  $X \in [0, 1]$ . This yields the latter two identities. Then, as  $X^2 - 2mX + m^2 = (X - m)^2$ , we have accumulated  $1 + 2m \leq 3$  of the identical error terms, yielding

$$\left| \frac{\sum_{i=1}^t (X_i - m)^2}{t} - \mathbb{E}[(X - m)^2] \right| \leq \sqrt{\frac{18n\sigma^2 \log \frac{4}{\alpha}}{t^2}} + \frac{\log \frac{4}{\alpha}}{t},$$

from which we express the stated bounds, using  $\mathbb{E}[(X - m)^2] \geq \sigma^2$  and  $\log \frac{4}{\alpha}/t \leq n \log \frac{4}{\alpha}/t^2$ . The lower bound then follows from completing the square.  $\square$

Further, we use the uniform version of Bennett's inequality to bound the sum of the observations in the first  $t$  rounds; again, for all  $m$  simultaneously.

**Proposition 13.** *Let  $X_1, \dots, X_n \in [0, 1]$  be i.i.d. random variables with mean  $\mu = \mathbb{E}[X]$  and variance  $\sigma^2 = \mathbb{V}[X]$ , and let  $0 \leq \lambda_i \leq C$  be random variables such that  $\lambda_i$  is independent of  $X_j$  for*

372  $j \geq i$  for some positive constant  $C$ . With probability at least  $1 - \alpha$  we have for all  $m \in [0, \mu]$  and all  
 373  $1 \leq t \leq n$  simultaneously that

$$\begin{aligned} \sum_{i=1}^t \lambda_i(X_i - m) &\leq C \left( \sqrt{2t\sigma^2 \log \frac{2}{\alpha}} + \frac{1}{3} \log \frac{2}{\alpha} + t(\mu - m) \right), \\ \sum_{i=1}^t \lambda_i(X_i - m) &\geq -C \left( \sqrt{2t\sigma^2 \log \frac{2}{\alpha}} + \frac{1}{3} \log \frac{2}{\alpha} \right), \\ \left| \sum_{i=1}^t (X_i - \mu) \right| &\leq C \sqrt{2t\sigma^2 \log \frac{2}{\alpha}} + \frac{C}{3} \log \frac{2}{\alpha}. \end{aligned}$$

374 *Proof.* We decompose the random variables  $\lambda_i(X_i - m)$  into a martingale difference sequence  
 375  $M_i = \lambda_i(X - \mu)$  and a drift term  $D_i = \lambda_i(\mu - m)$ . We bound deterministically the drift term:

$$0 \leq \sum_{i=1}^t D_i \leq tC(\mu - m),$$

376 and so it holds for all  $m$  and  $t$  simultaneously. We bound the martingale using the Freedman's-style  
 377 inequality from Proposition 10:

$$\mathbb{P} \left\{ \left| \sum_{i=1}^t M_i \right| \geq C \sqrt{2t\sigma^2 \log \frac{2}{\alpha}} + \frac{C}{3} \log \frac{2}{\alpha} \right\} \leq \alpha.$$

378 Adding up the two bounds concludes the proof.  $\square$

379 Finally, we introduce a quadratic lower-bound of a logarithm near zero.

380 **Lemma 14.** Let  $c \geq \frac{1}{2}$  and  $|x| \leq 1 - \frac{1}{2c}$ , then

$$\log(1 + x) \geq x - cx^2.$$

381 *Proof.* We inspect the behavior of  $f(x) = \log(1 + x) - x + cx^2$ . First,  $f(0) = 0$ . Now we look at  
 382 the derivatives  $f'(x) = 1/(x + 1) - 1 + 2cx$  and  $f''(x) = -1/(x + 1)^2 + 2c$ . Setting  $f'$  to zero,  
 383 we get  $x(1 - 2c - 2cx) = 0$ , so the roots are  $x_1 = 0$  and  $x_2 = 1/(2c) - 1$ , these points are local  
 384 extremes, concretely a local minimum and local maximum respectively by the second derivative test,  
 385 and so the inequality holds for  $x \geq 1/(2c) - 1$ .  $\square$

386 Now we are ready to restate the main theorem we are to prove.

387 **Theorem 15** (Theorem 8 restated). For every random variable  $X \in [0, 1]$  with mean  $\mu$  and variance  
 388  $\sigma^2 > 0$ , every  $\alpha, \delta \in (0, 1)$ , and  $c > 0$ , there is  $n_0$  depending on  $\alpha, \delta, \sigma^2, c$ , such that for all  $n \geq n_0$ ,  
 389 Algorithm 3 rejects at confidence level  $1 - \delta$  every  $m$  satisfying

$$m \leq \frac{\sum_{i=1}^n X_i}{n} - \sigma \sqrt{\frac{(2 + c) \log \frac{1}{\delta}}{n}}. \quad (9)$$

390 with probability at least  $1 - \alpha$ .

391 *Proof.* Statement (9) holds true if the events from Proposition 12 and Proposition 13 (applied on  
 392  $X_1, \dots, X_{c_2 n}$ , to be specified later) are met. Namely, Proposition 12 ensures that our estimator of  
 393  $\mathbb{E}[(X - m)^2]$  is never too small and is consistent. It also ensures that empirical mean of  $X$  converges  
 394 to  $\mu$ . Proposition 13 provides a bound on the wealth in an early stage. We note that both of the  
 395 propositions hold uniformly for all  $m \in [0, \mu]$ . Thus, we instantiate both of the bounds (with failure  
 396 probabilities  $\alpha/2$ ) and further assume that the events are met. Throughout the sketch, we will be  
 397 introducing new constants on the fly. For all constants, we have that we can choose a large enough  $n_0$   
 398 to make them arbitrarily close to 0.

399 We fix  $m \in [0, \mu]$  whose exact expression will be decided at the end of the proof. Let  $Y = X - m$   
 400 and  $\varepsilon = \mu - m$ . Let  $\ell_{\text{opt}} = \sqrt{\frac{2 \log \frac{1}{\delta}}{n(\sigma^2 + \varepsilon^2)}}$ . By Lemma 16, for any constant  $1/2 \geq c_1 > 0$ , we have that  
 401  $\log(1 + \ell Y) \geq \ell Y - (1/2 + c_1)\ell^2 Y^2$  for all  $\ell \leq \sqrt{2}\ell_{\text{opt}}$ .

402 **Analysis of the run of algo:** We split the  $n$  steps into an arbitrarily (relatively) short “warm up”  
 403 phase of  $c_2 n$  steps, where things can go poorly, but the effect of this will be negligible. Then,  
 404 there will be a “convergent phase” of  $(1 - c_2)n$  steps, in which  $(1 - c_3)\ell_{\text{opt}} \leq \ell_i \leq (1 + c_3)\ell_{\text{opt}}$ .  
 405 We briefly comment on the constants. By Lemma 16 it holds that  $c_1 \leq 3\ell_{\text{opt}} = O(1/\sqrt{n})$  as  
 406 long as  $\ell_{\text{opt}} < 0.1$ .  $c_2$  is arbitrary, so we can set it to  $O(n^{-1/4})$ . By Proposition 12, we have  
 407  $c_3 \leq \frac{1}{c} \left( \sqrt{18 \log \frac{8}{\alpha} / \sigma^2 n} + 11 \log \frac{8}{\alpha} / \sigma^2 n \right)$ , and so given the choice of  $c_2$ , we have  $c_3 \in O(n^{-1/4})$ .

408 **Warm up phase:** In this phase, we have  $0 \leq \ell_i \leq \sqrt{2}\ell_{\text{opt}}$  per the second part of Proposition 12  
 409 and the fact that  $\mathbb{E}[(X - m)^2] = \sigma^2 + \varepsilon^2$ .

410 First deterministically upper bound the quadratic term:

$$\sum_{i=1}^{c_2 n} \left( c_1 + \frac{1}{2} \right) \ell_i^2 Y_i^2 \geq 2n \left( c_1 + \frac{1}{2} \right) c_2 \ell_{\text{opt}}^2 = \left( c_1 + \frac{1}{2} \right) c_2 \frac{4 \log \frac{1}{\delta}}{\sigma^2 + \varepsilon^2}.$$

411 Next, by Proposition 13 applied on  $X_1, \dots, X_{c_2 n}$  and  $C = \sqrt{2}\ell_{\text{opt}}$ , we have

$$\begin{aligned} \sum_{i=1}^{c_2 n} \ell_i (X_i - m) &\geq -\sqrt{\frac{4 \log \frac{1}{\delta}}{n(\sigma^2 + \varepsilon^2)}} \left( \sqrt{2c_2 n \sigma^2 \log \frac{4}{\alpha}} + \frac{1}{3} \log \frac{4}{\alpha} \right) \\ &\geq -2\sqrt{2c_2 \log \frac{1}{\delta} \log \frac{4}{\alpha}} + \sqrt{\frac{4 \log \frac{1}{\delta} \log^2 \frac{4}{\alpha}}{9n(\sigma^2 + \varepsilon^2)}}, \end{aligned}$$

412 where we see that both the quadratic and linear term go to zero as  $n$  increases and  $c_2$  decreases.

413 **Convergent phase:** By Proposition 12, we have  $(1 - c_3)\ell_{\text{opt}} \leq \ell_i \leq (1 + c_3)\ell_{\text{opt}}$ . From the  
 414 definition of  $\ell_i$  we have that  $\ell_n^2 \sum_{i=1}^n Y_i^2 \leq 2 \log \frac{1}{\delta}$ . Thus,

$$\sum_{i=c_2 n+1}^n \ell_i^2 Y_i^2 \leq \sum_{i=1}^n \ell_i^2 Y_i^2 \leq \left( \frac{1 + c_3}{1 - c_3} \right)^2 \ell_n^2 \sum_{i=1}^n Y_i^2 \leq \left( \frac{1 + c_3}{1 - c_3} \right)^2 2 \log \frac{1}{\delta}.$$

415 Now, we add up the lower bounds from the warm-up phase and from the quadratic term in the  
 416 convergent case:

$$\begin{aligned} &\overbrace{-2\sqrt{2c_2 \log \frac{1}{\delta} \log \frac{4}{\alpha}} + \sqrt{\frac{4 \log \frac{1}{\delta} \log^2 \frac{4}{\alpha}}{9n(\sigma^2 + \varepsilon^2)}}}^{\text{Warm-up phase}} - \left( c_1 + \frac{1}{2} \right) c_2 \frac{4 \log \frac{1}{\delta}}{\sigma^2 + \varepsilon^2} - \overbrace{\left( c_1 + \frac{1}{2} \right) \left( \frac{1 + c_3}{1 - c_3} \right)^2 2 \log \frac{1}{\delta}}^{\text{Quadratic term in the convergent phase}} \\ &= -(1 + c_4) \log \frac{1}{\delta}, \end{aligned}$$

417 for some  $c_4 > 0$ . Finally, we lower bound the log-wealth:

$$\sum_{i=1}^n \log(1 + \ell_i Y_i) \geq \ell_{\text{opt}}(1 - c_3) \left( \sum_{i=c_2 n+1}^n Y_i \right) - (1 + c_4) \log \frac{1}{\delta},$$

418 which is greater than  $\log \frac{1}{\delta}$  if

$$\frac{\sum_{i=c_2 n+1}^n X_i}{(1 - c_2)n} - m \geq \frac{\overbrace{(2 + c_4)}^{c_5 + \sqrt{2}}}{\sqrt{2}(1 - c_3)(1 - c_2)} \sqrt{\frac{(\sigma^2 + \varepsilon^2) \log \frac{1}{\delta}}{n}}. \quad (10)$$

419 From Proposition 13, we have assumed the events

$$-\frac{1}{n} \sum_{i=1}^{c_2 n} X_i \geq -\frac{\sqrt{2c_2 \sigma^2 \log \frac{4}{\alpha}}}{\sqrt{n}} - \mu c_2 - \frac{1}{3n} \log \frac{4}{\alpha} \geq -c_6/\sqrt{n} - \mu c_2$$

420 and

$$\frac{1}{n} \sum_{i=c_2 n+1}^n (X_i - \mu) \geq -\frac{\sqrt{2\sigma^2 \log \frac{4}{\alpha}}}{\sqrt{n}} - \frac{1}{3n} \log \frac{4}{\alpha} \geq -\frac{\sqrt{4\sigma^2 \log \frac{4}{\alpha}}}{\sqrt{n}}.$$

421 We now reveal our choice of  $m$ :

$$m = \frac{\sum_{i=1}^n X_i}{n} - (c_5 + \sqrt{2})(1 + \varepsilon/\sigma) \sqrt{\frac{\sigma^2 \log \frac{1}{\delta}}{n}} - \frac{c_6 + c_2 \sqrt{4\sigma^2 \log \frac{4}{\alpha}}}{\sqrt{n}}.$$

422 We can now show the value of  $m$  we have selected satisfies (10) and so it will result in a log-wealth  
423 bigger than  $\frac{1}{\delta}$ . Observe that

$$\begin{aligned} \frac{\sum_{i=c_2 n+1}^n X_i}{(1-c_2)n} &\geq (1+c_2) \frac{\sum_{i=c_2 n+1}^n X_i}{n} \\ &= \frac{\sum_{i=1}^n X_i}{n} + c_2 \left( \frac{\sum_{i=c_2 n+1}^n X_i}{n} - \mu \right) + c_2 \mu - \frac{\sum_{i=1}^{c_2 n} X_i}{n}. \end{aligned}$$

424 Hence, we have

$$\frac{\sum_{i=c_2 n+1}^n X_i}{(1-c_2)n} - m \geq (c_5 + \sqrt{2}) \sqrt{\frac{(\sigma^2 + \varepsilon^2) \log \frac{1}{\delta}}{n}}.$$

425 Moreover, observe that these last inequalities apply for all  $m' \leq m$ .

426 Thus, for the chosen  $m$ , we have reached log-wealth  $\log \frac{1}{\delta}$  and so it is rejected. Finally, we have  
427 assumed the event  $|\frac{1}{n} \sum_{i=1}^n X_i - \mu| \leq 1/\sqrt{n}$  from (8). So, recalling that  $\varepsilon = \mu - m$ , for our choice  
428 of  $m$  we also have  $\varepsilon \approx 1/\sqrt{n}$ . Hence, we can make  $(c_5 + \sqrt{2})(1 + \varepsilon/\sigma)$  arbitrarily close to  $\sqrt{2}$  and  
429  $c_2, c_6$  arbitrarily close to 0, finishing the proof.  $\square$

430 **Lemma 16.** Let  $c \geq \frac{1}{2}$  and  $|x| \leq 1 - \frac{1}{2c}$ , then

$$\log(1+x) \geq x - cx^2.$$

431 *Proof.* We inspect the behavior of  $f(x) = \log(1+x) - x + cx^2$ . First,  $f(0) = 0$ . Now we look at  
432 the derivatives  $f'(x) = 1/(x+1) - 1 + 2cx$  and  $f''(x) = -1/(x+1)^2 + 2c$ . Setting  $f'$  to zero,  
433 we get  $x(1-2c-2cx) = 0$ , so the roots are  $x_1 = 0$  and  $x_2 = 1/(2c) - 1$ , these points are local  
434 extremes, concretely a local minimum and local maximum respectively by the second derivative test,  
435 and so the inequality holds for  $x \geq 1/(2c) - 1$ .  $\square$

## 436 B Bernstein betting

437 We derive the algorithm for Bernstein testing referenced in Figure 1 and show that  $\star$ ing it is a  
438 strict improvement. The steps are analogical to the Hoeffding's betting derivation. We note that the  
439 provided version of Bernstein's inequality is mildly weaker than the standard one in the interest of  
440 simplicity.

441 **Lemma 17** (Bernstein simplified). Let  $X \in [0, 1]$  with mean  $\mu = \mathbb{E}[X]$  and variance  $\sigma^2 = \mathbb{V}[X]$ ,  
442 then

$$\mathbb{E} \left[ e^{\ell \cdot (X - \mu) - \sigma^2 \ell^2} \right] \leq 1, \quad \forall \ell \in \mathbb{R}. \quad (11)$$

443 Furthermore, the sequence  $W_0 = 1$ ,  $W_{i+1} = W_i \exp(\ell \cdot (X_i - \mu) - \sigma^2 \ell^2)$  for  $i \geq 0$  is a test  
444 process.

445 **Proposition 18.** Let  $m \in [0, 1]$ . Whenever Algorithm 5 rejects the null hypothesis  $H_0(m) : m =$   
446  $\mathbb{E}[X]$ , then so does Algorithm 6 if they share the realizations  $X_t$ ,  $1 \leq t \leq n$ .

447 *Proof.* Let  $\mathcal{C} = \{\lambda : \lambda \sum_{i=1}^n (X_i - m) - n\sigma^2 \lambda^2 \geq \log \frac{1}{\delta}\}$ . Consider Algorithm 5 and we first show  
448 that

$$\ell^B = \arg \min_{\lambda \in \mathcal{C}} \sum_{i=1}^n X_i.$$

449 We rewrite the constraint as  $\sum_{i=1}^n X_i \geq nm + \log \frac{1}{\delta} / \lambda + n\sigma^2 \lambda$ , so the solution is  $\lambda = \sqrt{\log \frac{1}{\delta} / (n\sigma^2)}$ .  
 450 Now, consider Algorithm 6. By the same argument,  $\ell_{\star}^B$  at time  $t$  is minimizing  $\sum_{i=t}^n X_i$  under the  
 451 constraint that the null hypothesis is rejected. Consequently, the required  $\sum_{i=1}^n X_i$  for Algorithm 6  
 452 is initially the same as for Algorithm 5, but it decreases whenever  $\ell_{\star}^B$  changes with respect to the  
 453 previous iteration.  $\square$

---

#### Algorithm 5 Bernstein testing

---

**Require:** i.i.d.  $X_1, \dots, X_n \in [0, 1]$ ,

**Require:**  $\delta > 0, m \in [0, 1], n, \sigma^2 = \mathbb{V}[X]$ .

$W \leftarrow 1$

454 **for**  $t = 1 \dots n$  **do**

$\ell^B \leftarrow \sqrt{(\log \frac{1}{\delta}) / (n\sigma^2)}$

$W \leftarrow W \exp(\ell^B \cdot (X_t - m) - (\sigma \ell^B)^2)$

**if**  $W \geq \frac{1}{\delta}$  **then**

Reject  $H_0(m) : m = \mathbb{E}[X]$

---



---

#### Algorithm 6 $\star$ - Bernstein testing

---

**Require:** i.i.d.  $X_1, \dots, X_n \in [0, 1]$ ,

**Require:**  $\delta > 0, m \in [0, 1], n, \sigma^2 = \mathbb{V}[X]$ .

$W \leftarrow 1$

**for**  $t = 1 \dots n$  **do**

$\ell_{\star}^B \leftarrow \sqrt{(\log \frac{1}{W\delta})_+ / ((n-t+1)\sigma^2)}$

$W \leftarrow W \exp(\ell_{\star}^B \cdot (X_t - m) - (\sigma \ell_{\star}^B)^2)$

**if**  $W \geq \frac{1}{\delta}$  **then**

Reject  $H_0(m) : m = \mathbb{E}[X]$

---

## 455 C Experiments

456 We provide CDF plots as we believe they contain most information about the behavior of the  
 457 confidence interval. We repeat the description from the main paper.

458 In short, the more the curve is to the right, th better,

459 Every algorithm provides a lower bound on the mean parameter of the corresponding distribution.  
 460 We repeat the experiment 1000 times and for every algorithm plot the empirical CDF of the produced  
 461 lower bounds. I.e., curve passing through point  $(x, y)$  should be understood as  $y$ —fractions of the  
 462 lower bounds are smaller than  $x$ . We include a vertical and a horizontal magenta line representing the  
 463 mean (vertical) and  $1 - \delta$  (horizontal) as the desired coverage. The eCDF of the algorithm passes  
 464 the vertical line at point  $(\mu, \delta')$ , where  $\mu$  is the true mean and  $1 - \delta'$  is the empirical coverage. We  
 465 have zoomed in to a box centered at  $(\mu, 1 - \delta)$  to see what is the coverage; also, we have added black  
 466 vertical lines corresponding to 0.95— one-sided confidence intervals. if the eCDF meets the vertical  
 467 magenta line above (resp. below) the black line, it has coverage smaller (resp. bigger) than  $1 - \delta$  at  
 468 confidence level 0.95. All algorithms apart from T-test have guaranteed coverage at least  $1 - \delta$ , so if  
 469 they occur under the black line, it is by a chance.

### 470 C.1 Experimental results

471 Here we provide general experimental results We always show STaR bet from Algorithm 4 with details  
 472 from D. Hedged-CI is from [19] with the default settings. T-test and (randomized) Clopper-Pearson  
 473 intervals are standard.

474 **Bernoulli:** Here, we can see that  $\star$  is performing very closely to randomized Clopper-Pearson  
 475 and outperforming standard Clopper-Pearson on small sample sizes. On the larder sample sizes, the  
 476 performance of all three algorithms become very similar, significantly outperforming Hedge-CI.

477 **Beta:** Here, we compete with T-test based confidence interval with no formal guarantees. We can  
 478 see that as long as  $a > b$  ( $a, b$  are parameters of the beta distributions), T-test is outperforming  $\star$ ;  
 479 however, it clearly has larger coverage than  $1 - \delta$ , violating the principles of confidence intervals.  
 480 When  $b > a$ ,  $\star$  usually provides shorter intervals than T-test. Hedged-CI provides much larger ones.  
 481 With increasing  $n$ , the performance of T-test and of  $\star$  become essentially identical.

482 **Coverage:** In the majority of cases, the coverage of  $\star$  is statistically indistinguishable from  $1 - \delta$ .  
 483 Coverage of Hedged-CI is usually 1.

Bernoulli,  $\delta = 0.05$ , averaged over 1000 runs

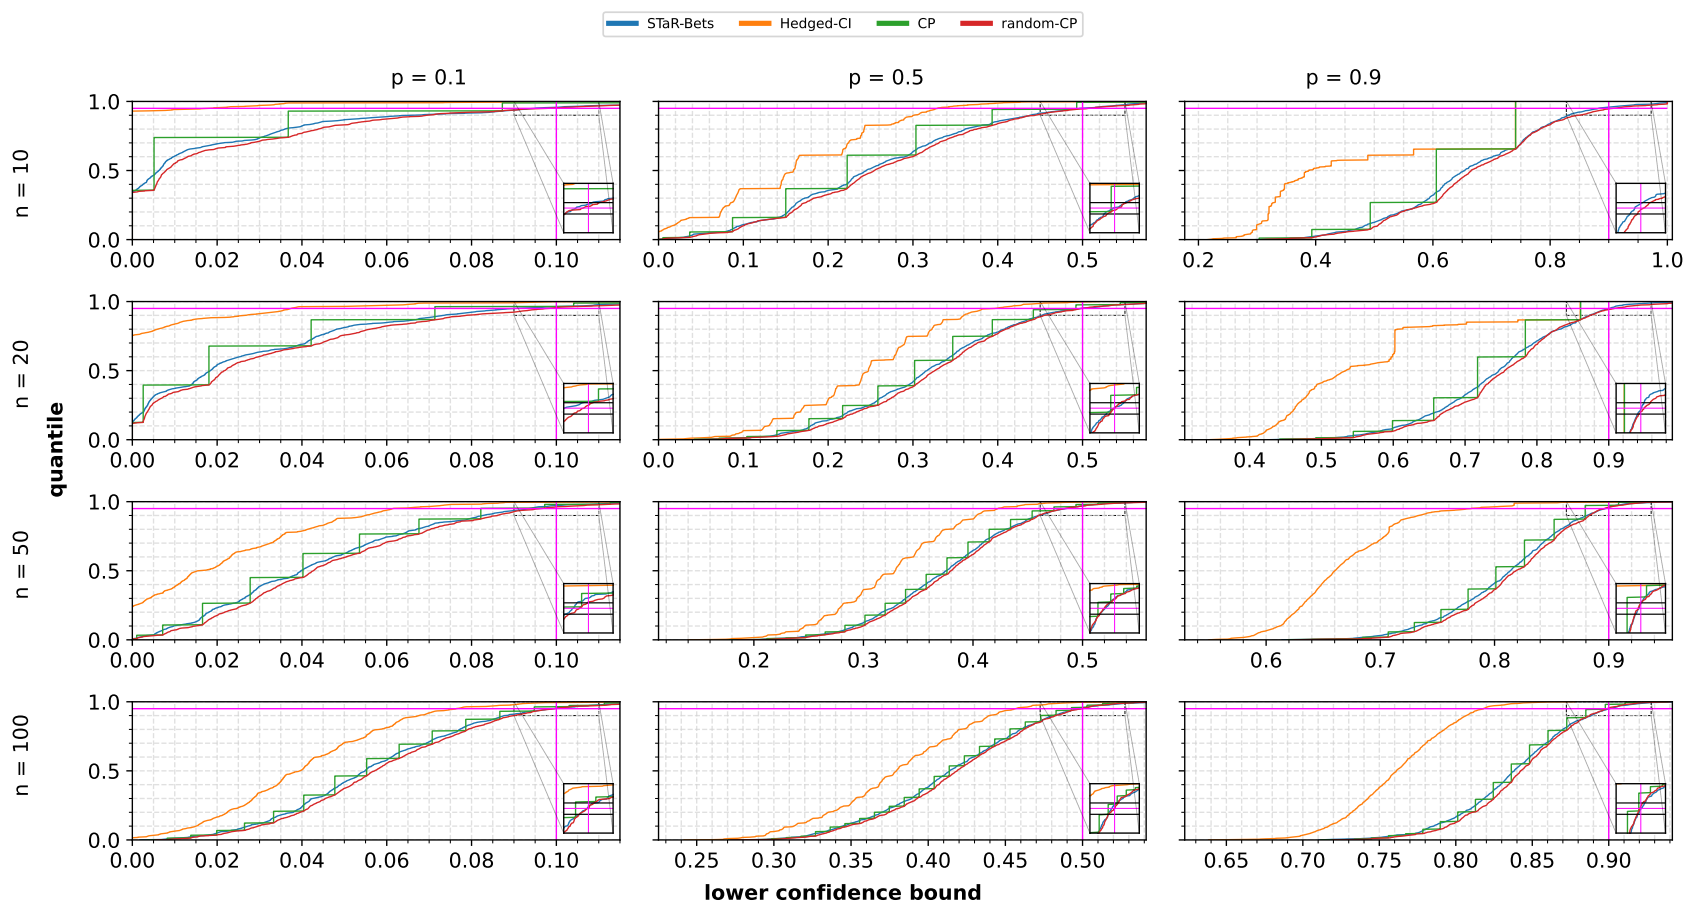



Bernoulli,  $\delta = 0.05$ , averaged over 1000 runs

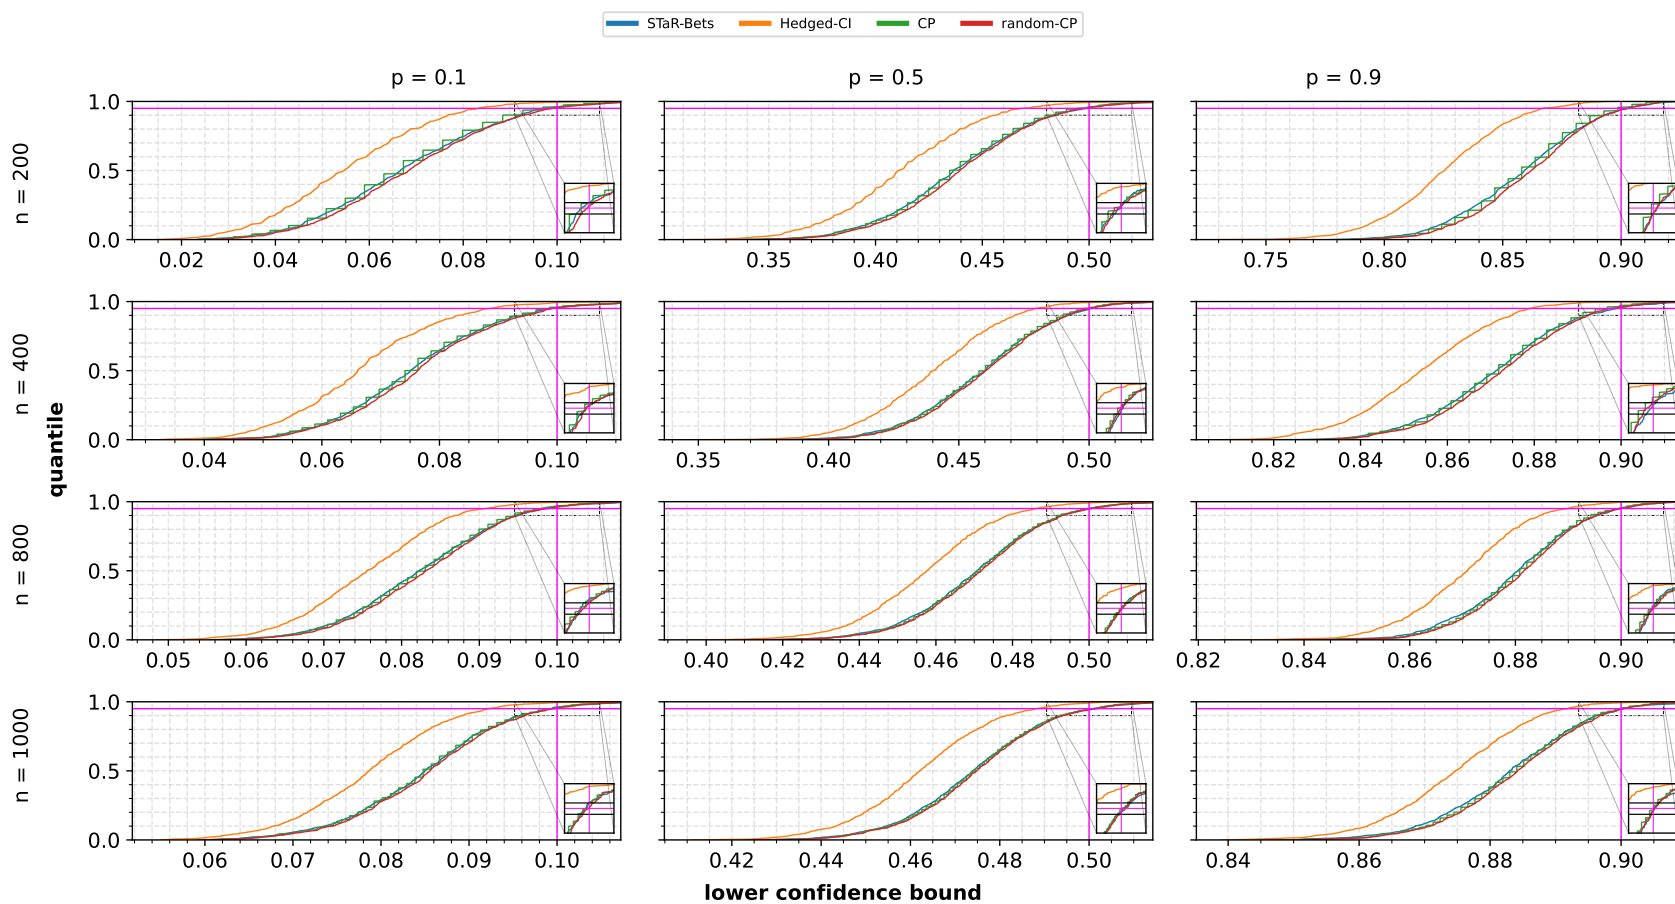

Beta,  $n = 10$ ,  $\delta = 0.05$ , averaged over 1000 runs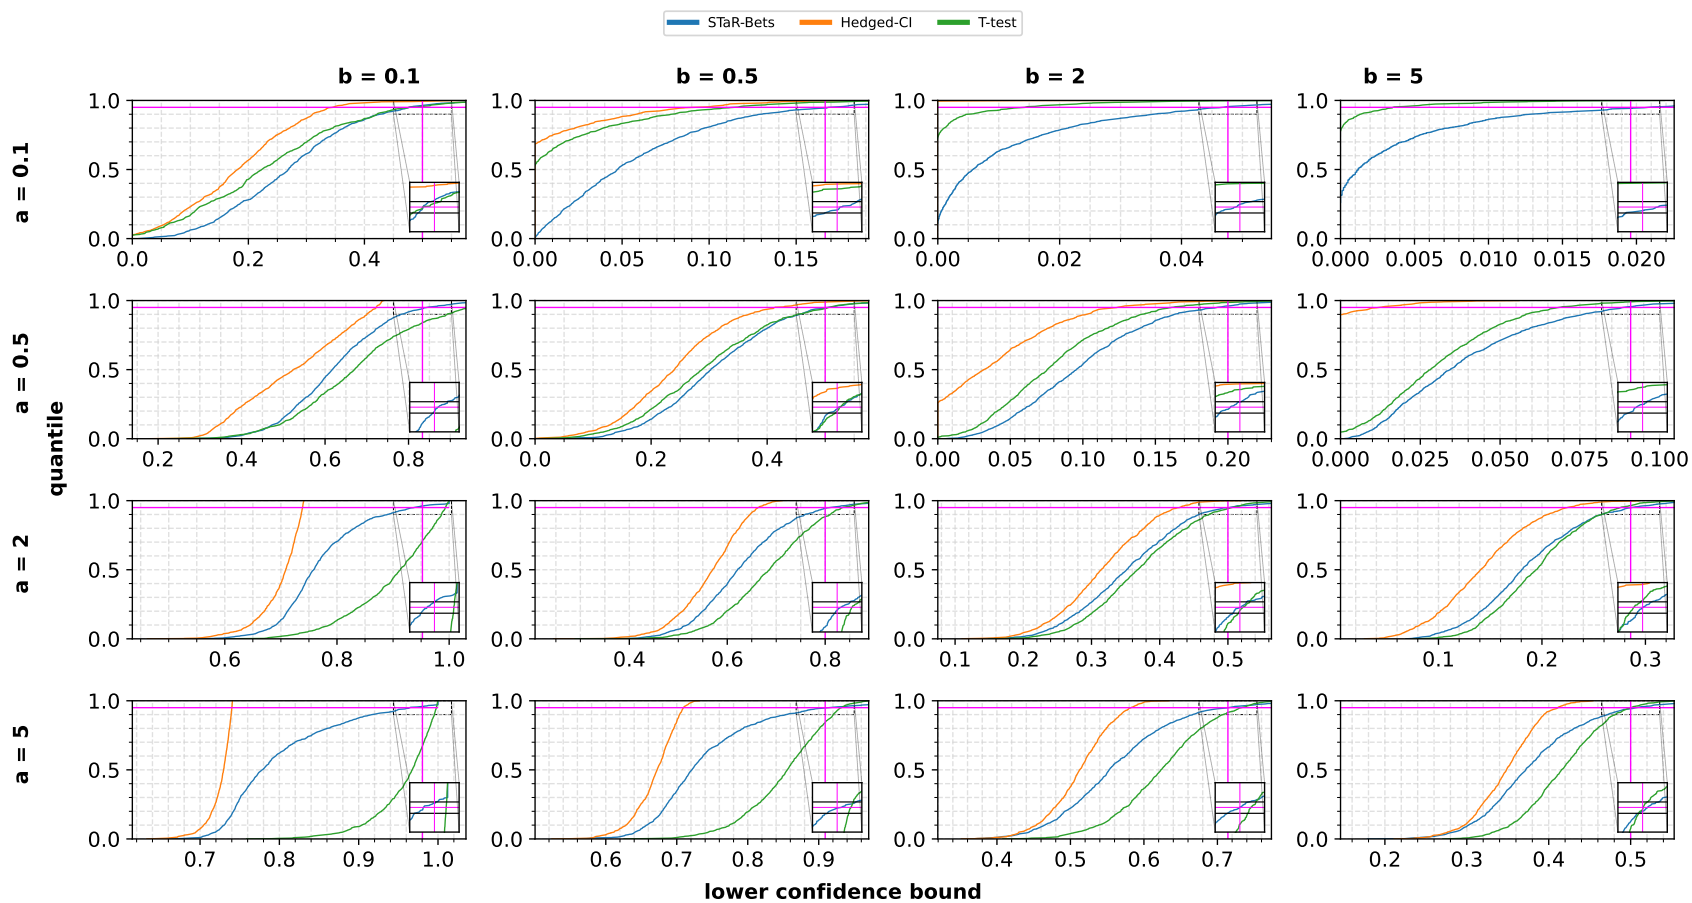

Beta,  $n = 50$ ,  $\delta = 0.05$ , averaged over 1000 runs

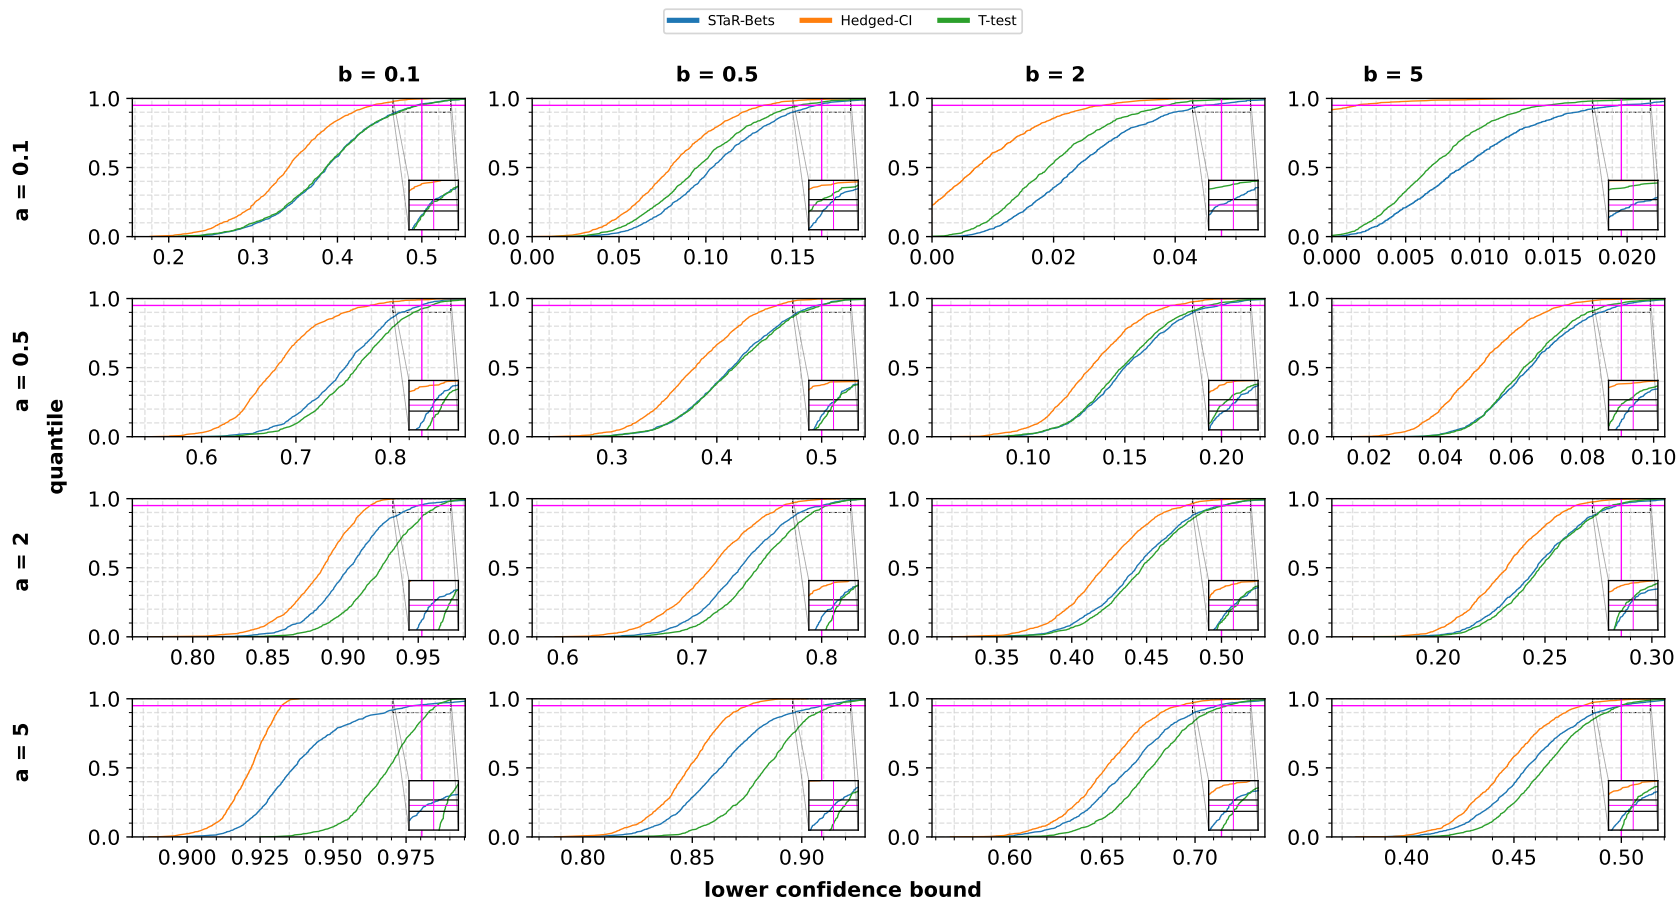

Beta,  $n = 500$ ,  $\delta = 0.05$ , averaged over 1000 runs

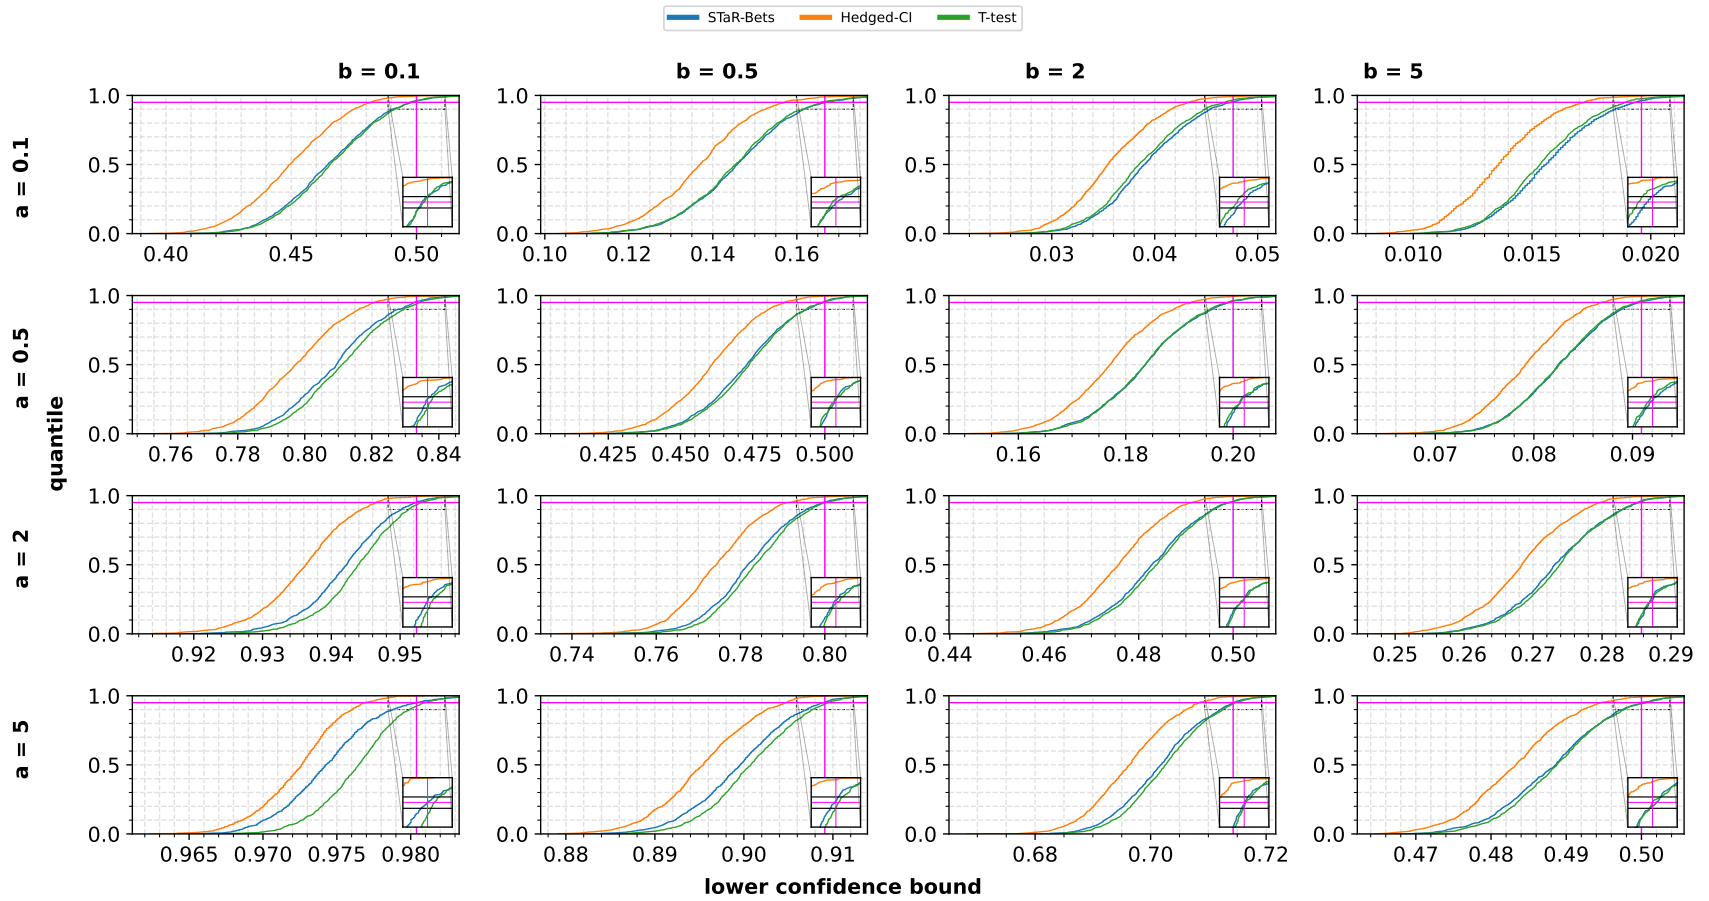

## 489 **C.2 Influence of $\delta$**

490 The majority of the experiments are made with  $\delta = 0.05$ ; here, we present the subset of the  
491 experiments with different values of  $\delta$ . The results follow the patterns observed with  $\delta = 0.05$ .

Bernoulli, delta = 0.001, averaged over 1000 runs

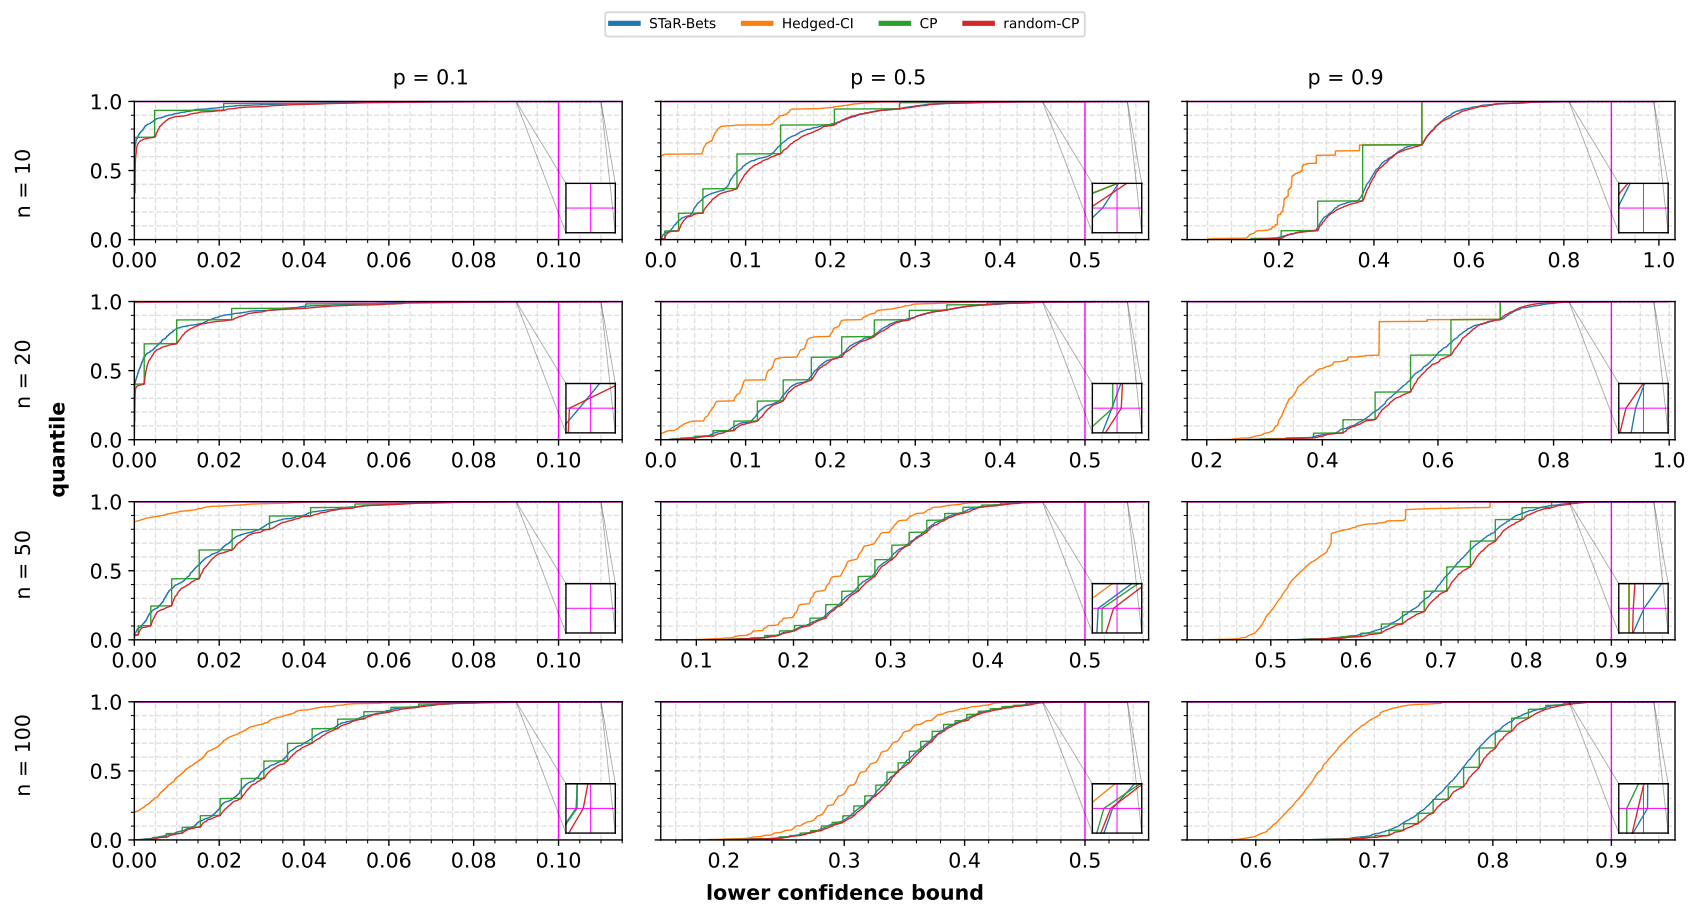

Bernoulli,  $\delta = 0.01$ , averaged over 1000 runs

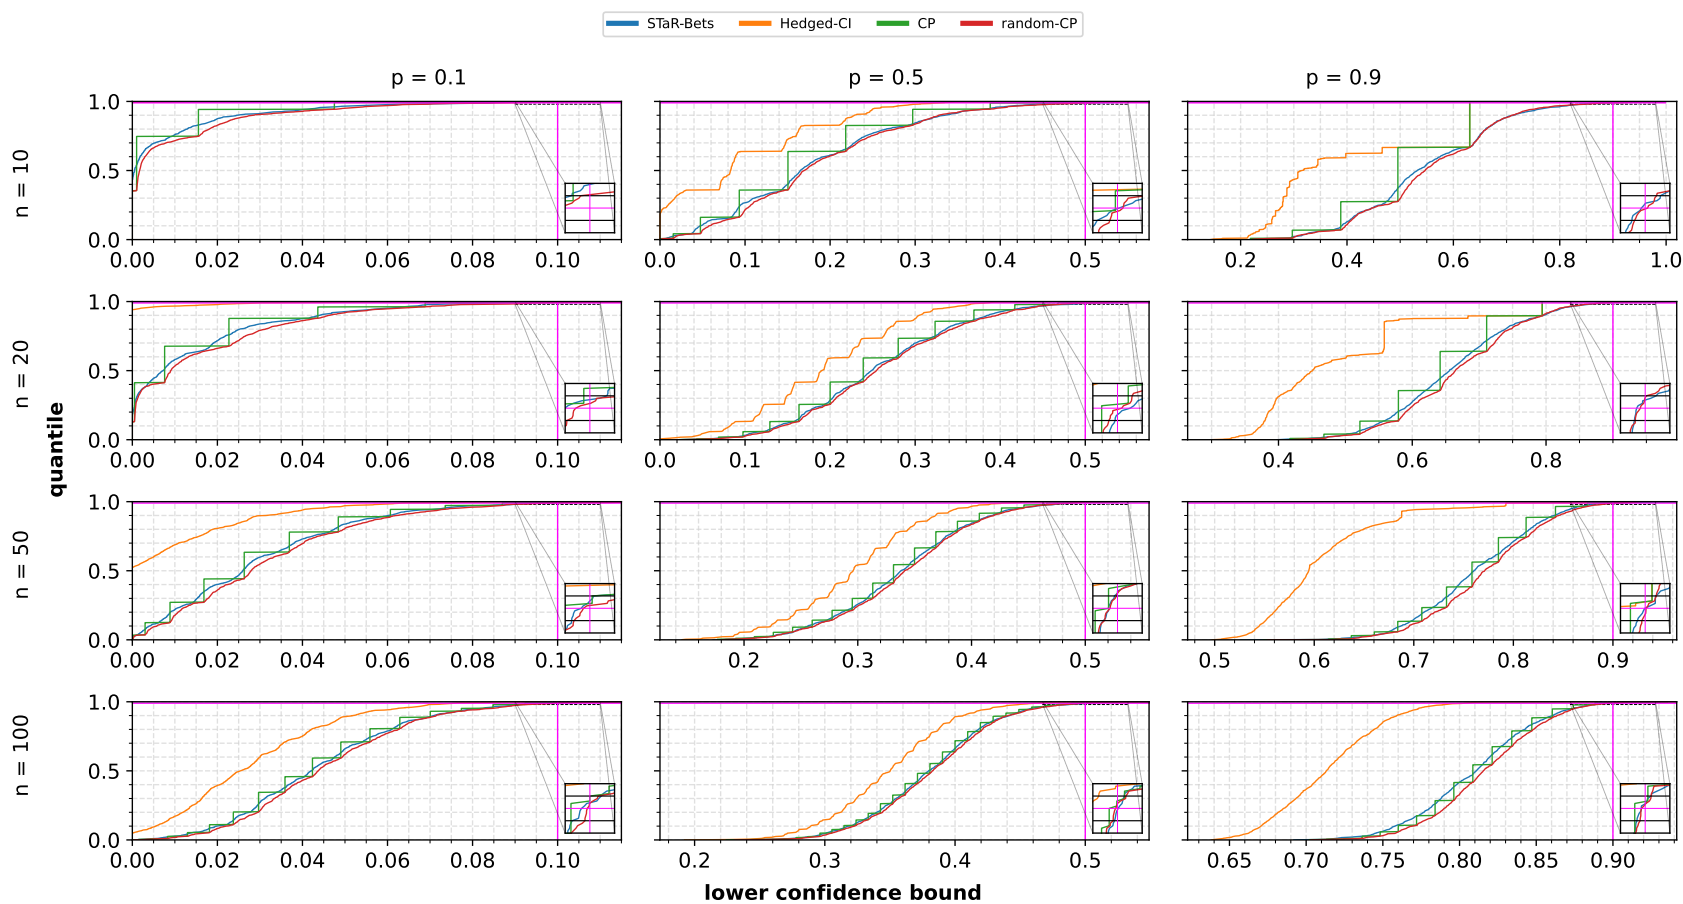

Beta,  $n = 100$ ,  $\delta = 0.001$ , averaged over 1000 runs

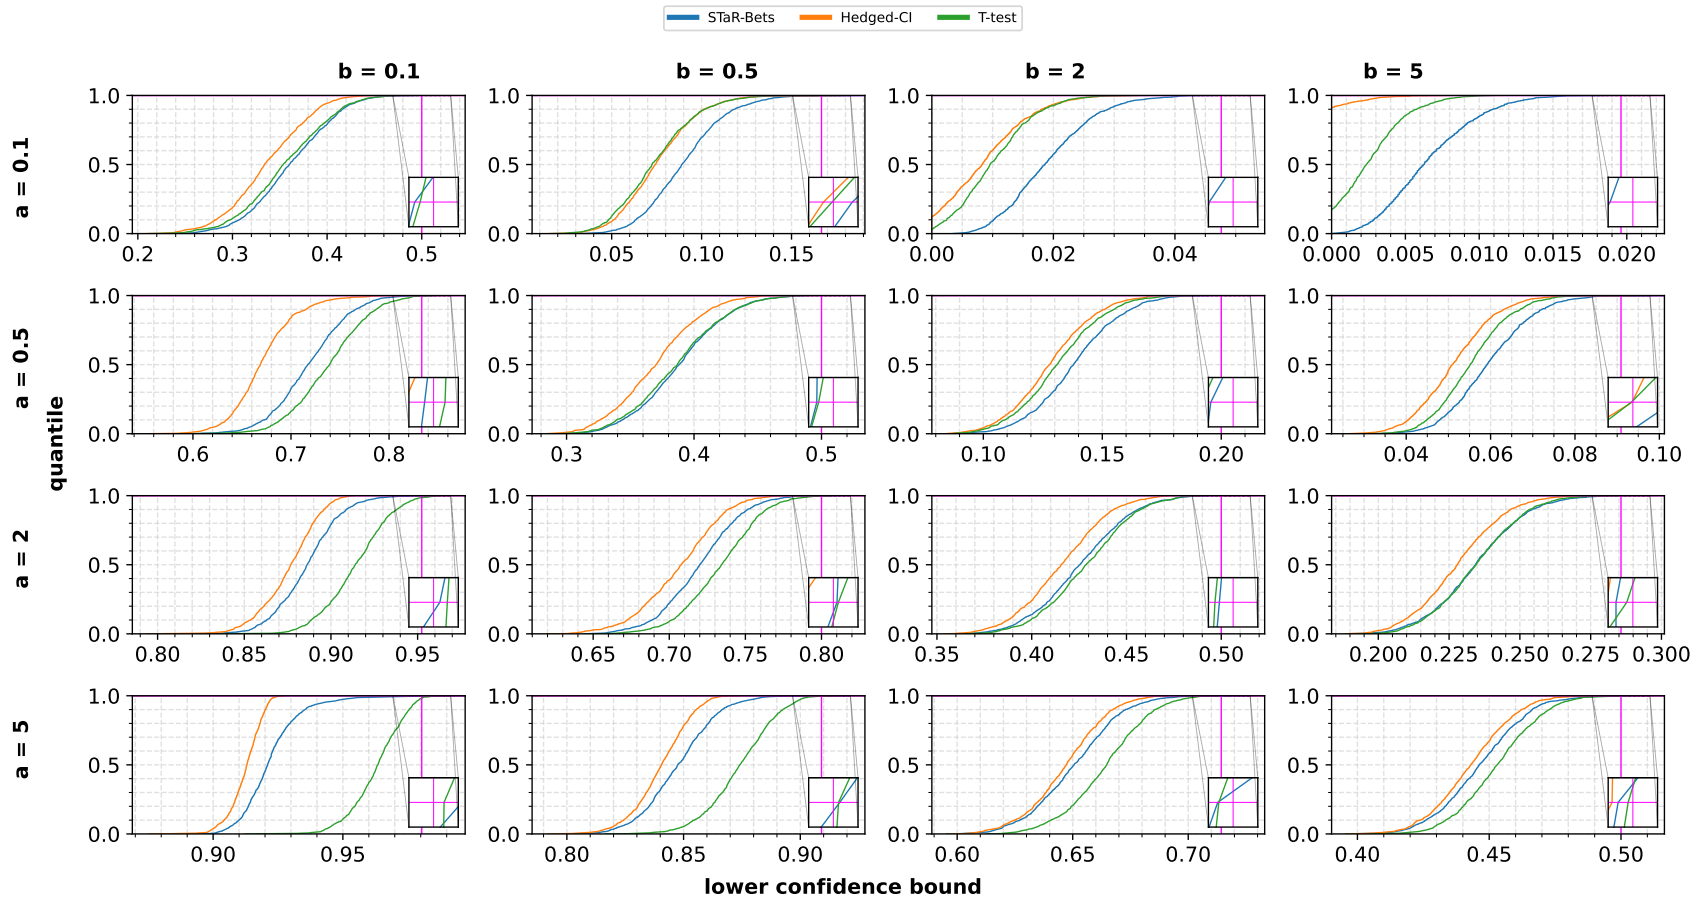



Beta,  $n = 100$ ,  $\delta = 0.001$ , averaged over 1000 runs



### 496 C.3 Selection of $c$

497 As discussed in Appendix D.3, we estimate the expectation  $\mathbb{E}[(X - m)^2]$  using the empirical mean  
498 with an additive  $cmn/(t - 1)^2$  term, where  $t$  is the current round,  $n$  is the number of rounds and  $c$   
499 is a free parameter. We provide experiments suggesting that the algorithm is not so sensitive about  
500 the choice, especially as  $n$  increases, and we choose  $c = 1$  as a natural choice to not overfit on our  
501 benchmark distributions.

502 In the following experiments, we used Algorithm 4 with the details in Appendix D sweeping over  
503 exponentially spaced grid of values of  $c$ .

Bernoulli, delta = 0.05, averaged over 1000 runs

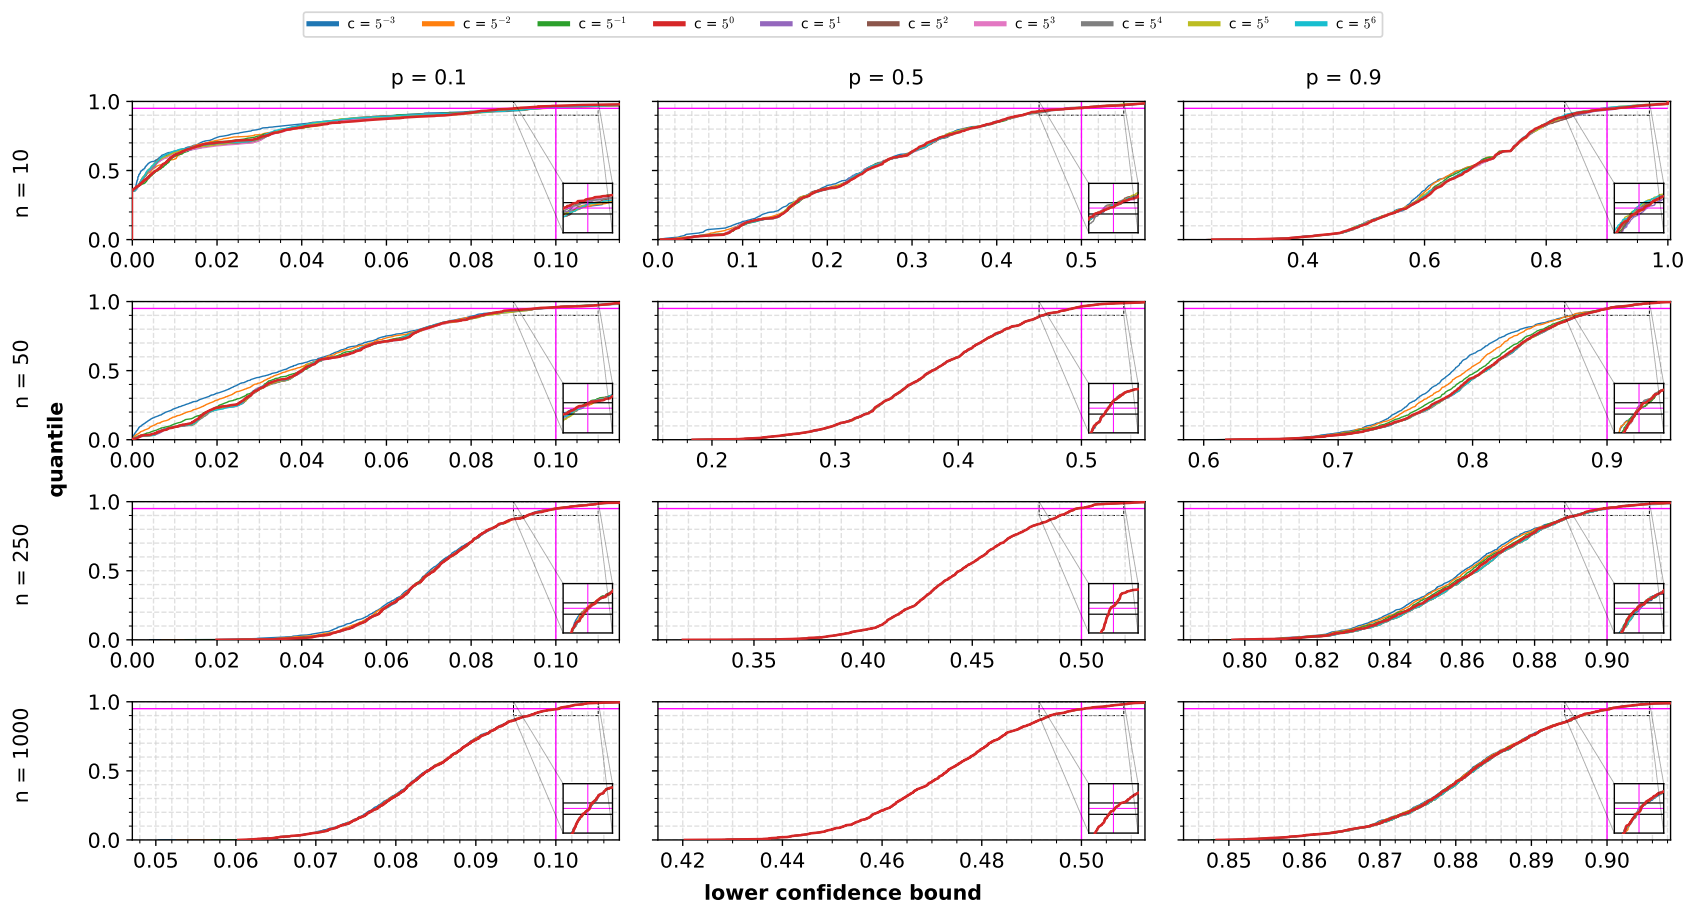

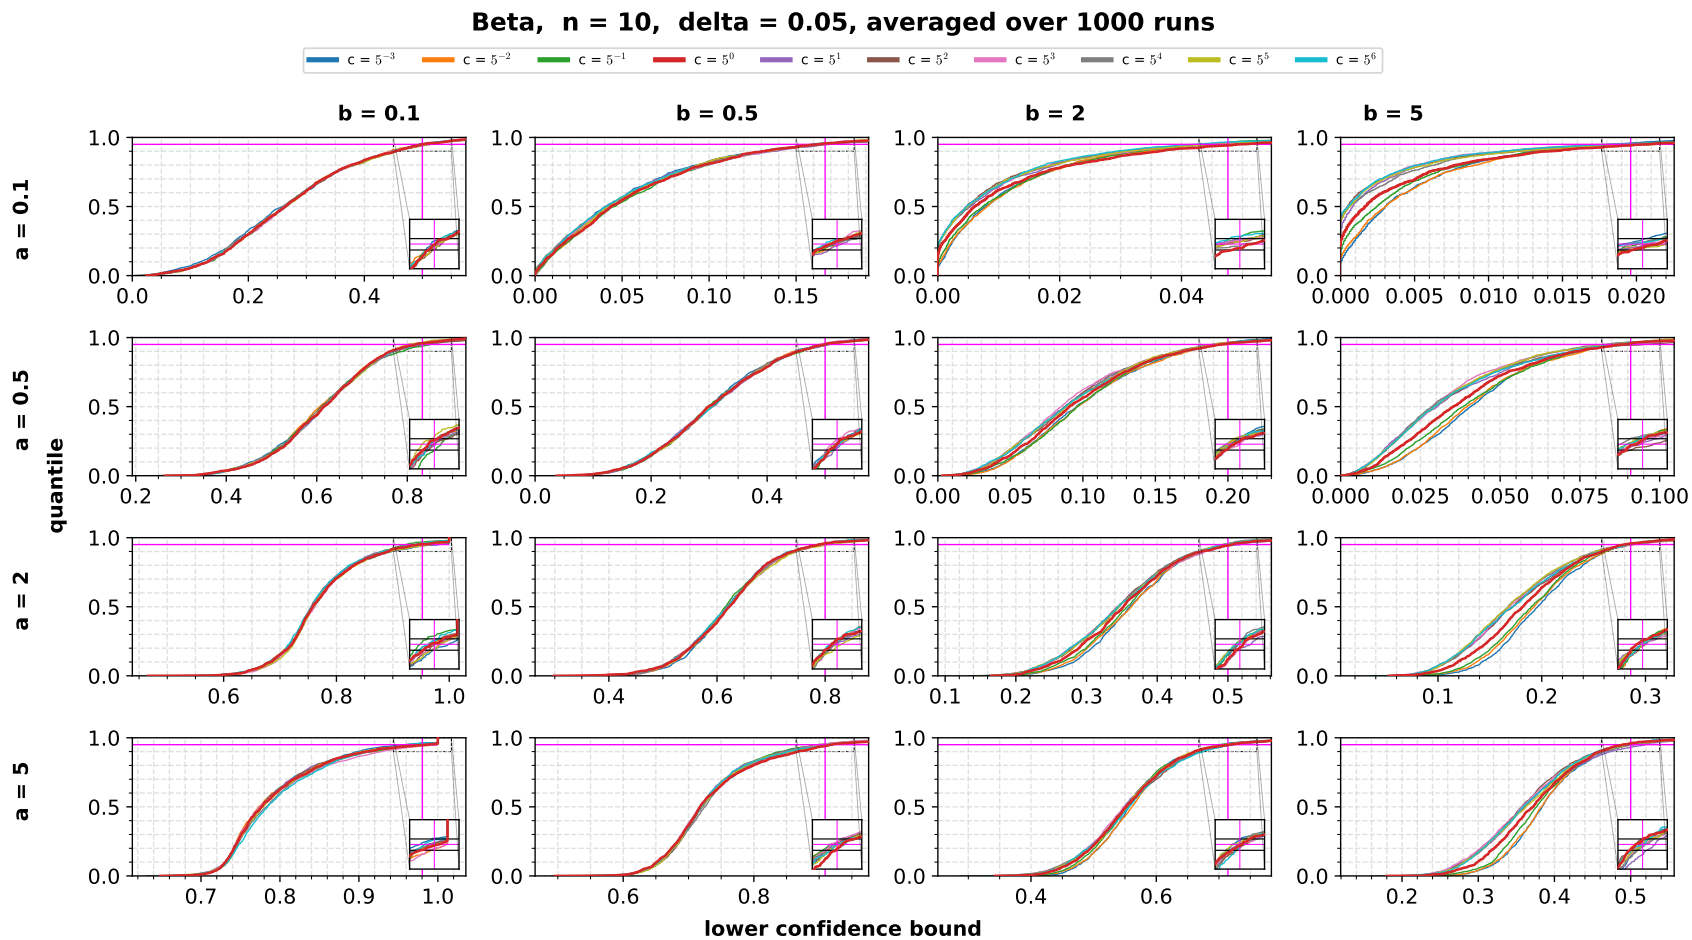

Beta,  $n = 50$ ,  $\delta = 0.05$ , averaged over 1000 runs

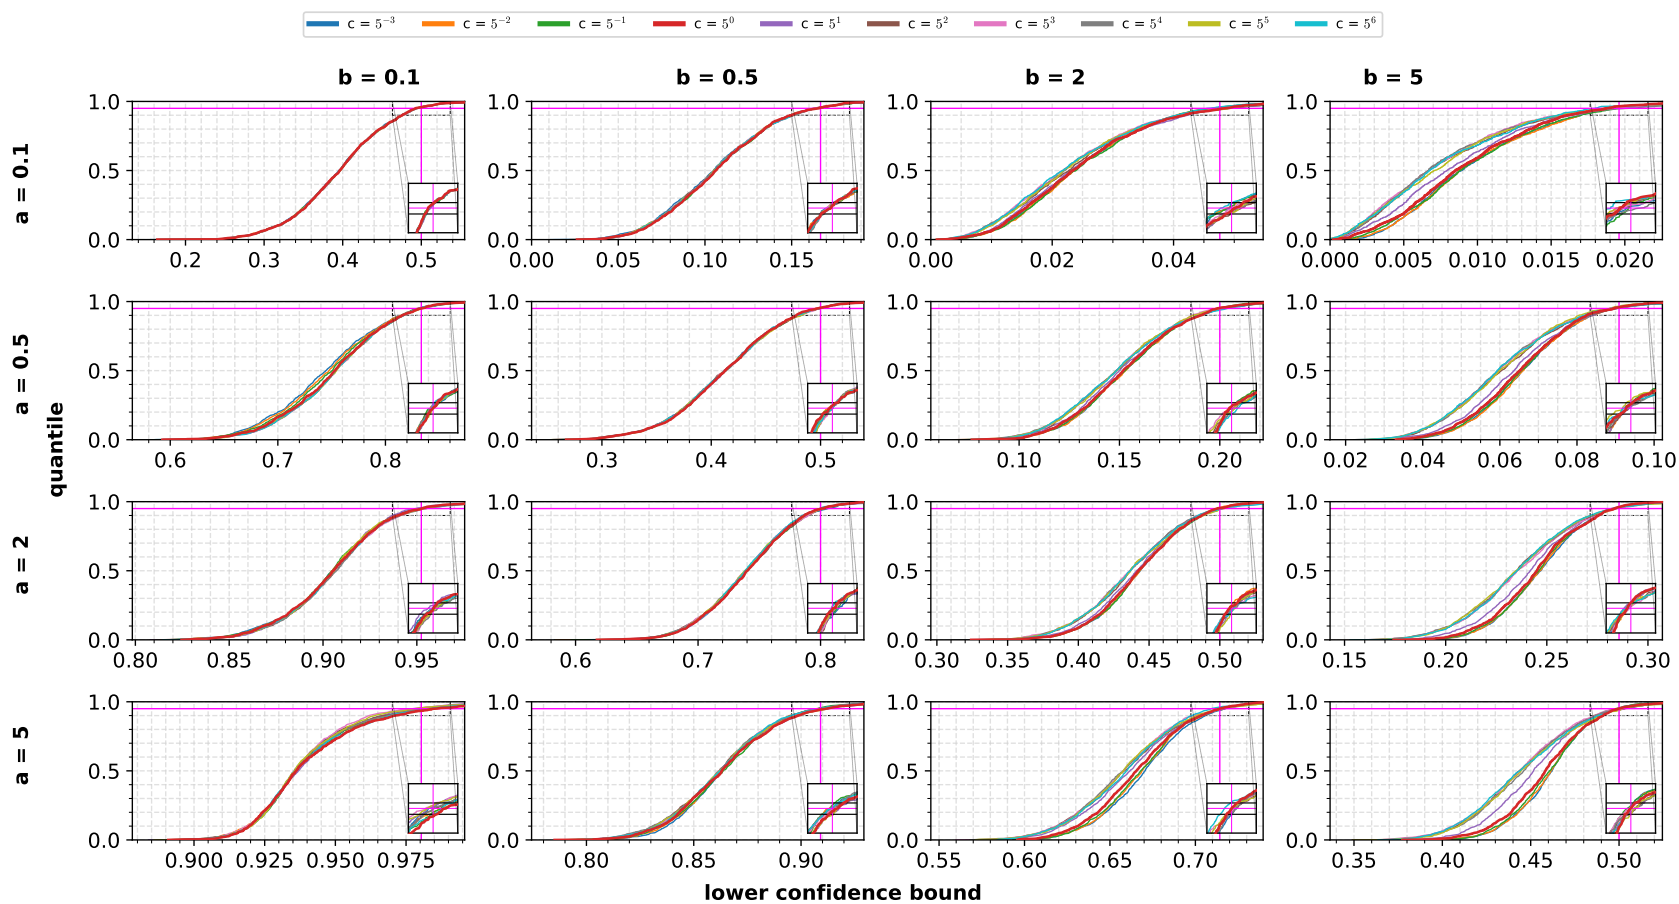

#### 507 C.4 Last round bet

508 Here we provide experiments quantifying the effect of (an additional) last round betting described in  
509 Appendix D.2.

- 510 • STaR-Bets is Algorithm 4 with detail from D.
- 511 • Bets is STaR-Bets without  $\star$  component
- 512 • (STaR) bets w/o last bet are the first two algorithms without the last round bet, described  
513 in D.2).
- 514 • Hedged-CI is the confidence interval of [19].

515 We can see that Hedged-CI performs similarly to Bets without last bet, and STaR bets without the  
516 last bet is significantly stronger. Adding last bet help both algorithms, but the effect is less significant  
517 on STaR, since by design, it tries to end up with 0 or  $\frac{1}{\delta}$  money. Sometimes the performance of  
518 Hedged-CI and Bets without last bet (and also of the pair STaR with/without last bet) are so similar,  
519 that the curves are indistinguishable.

**Bernoulli,  $\delta = 0.05$ , averaged over 1000 runs**

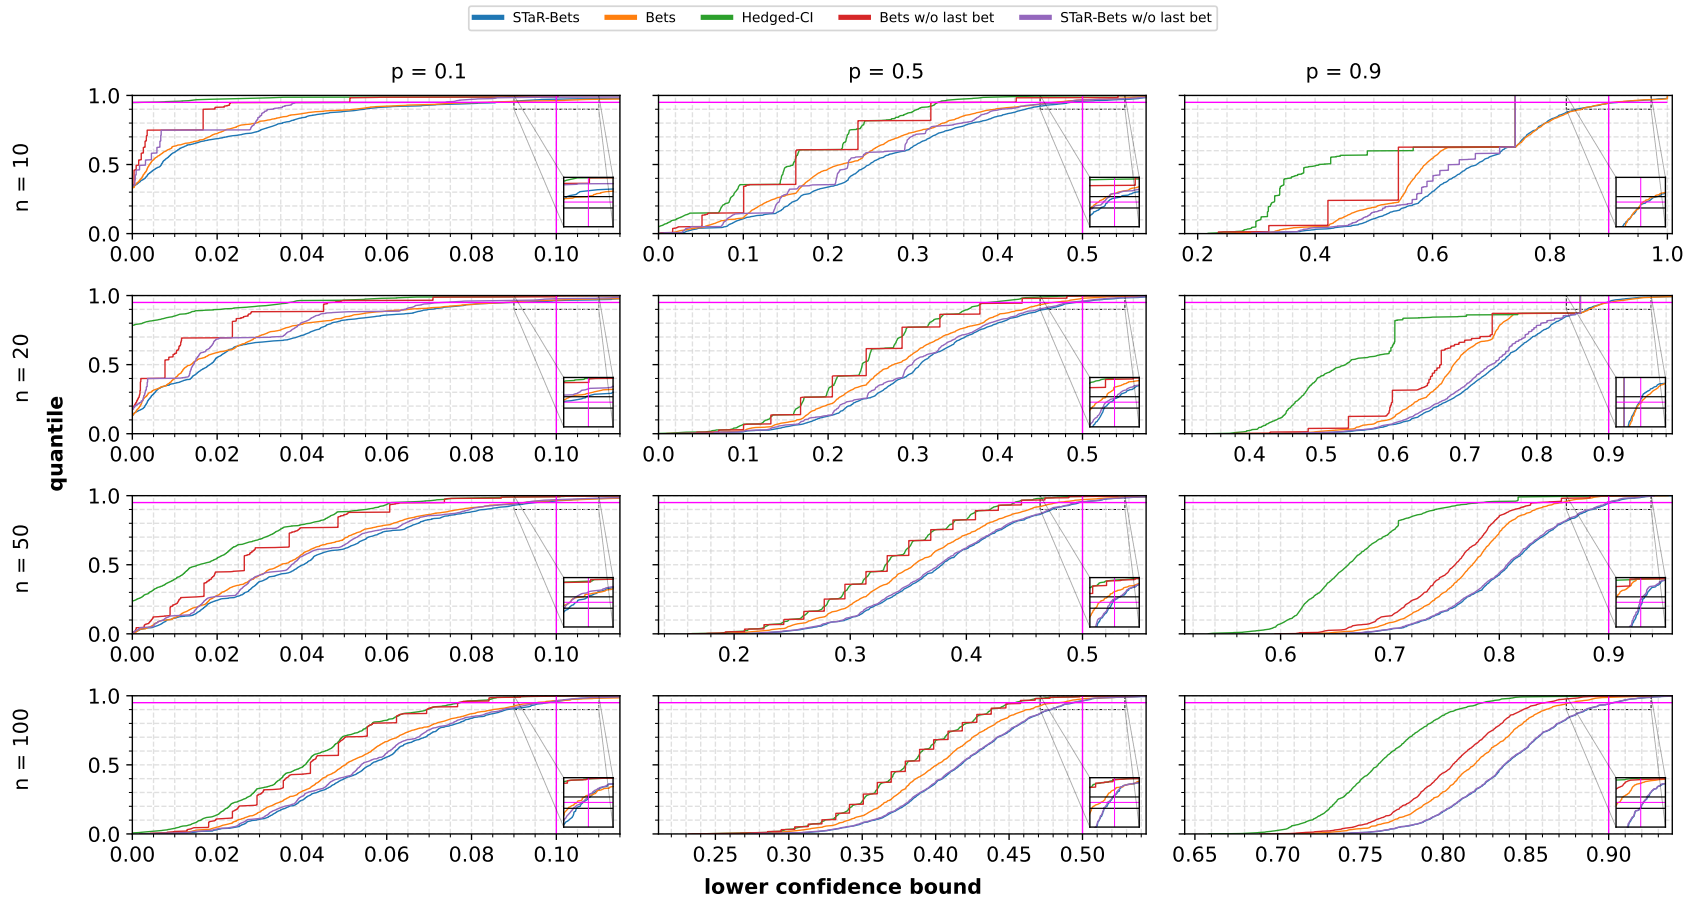

Beta,  $n = 100$ ,  $\delta = 0.05$ , averaged over 1000 runs

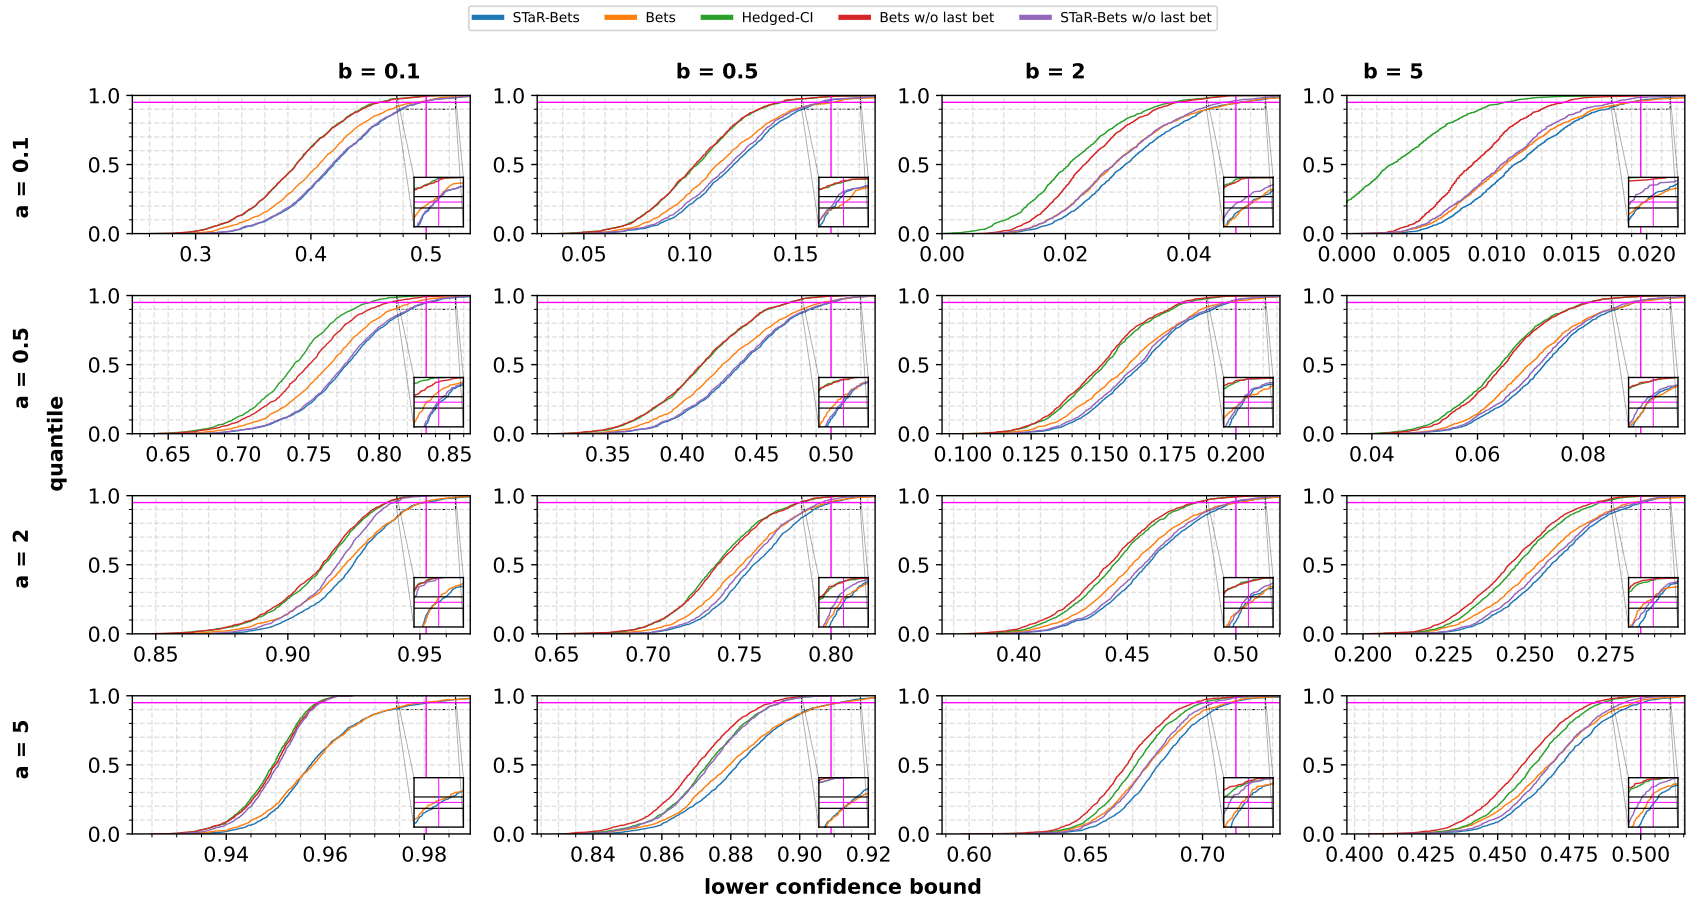



Beta,  $n = 1000$ ,  $\delta = 0.05$ , averaged over 1000 runs

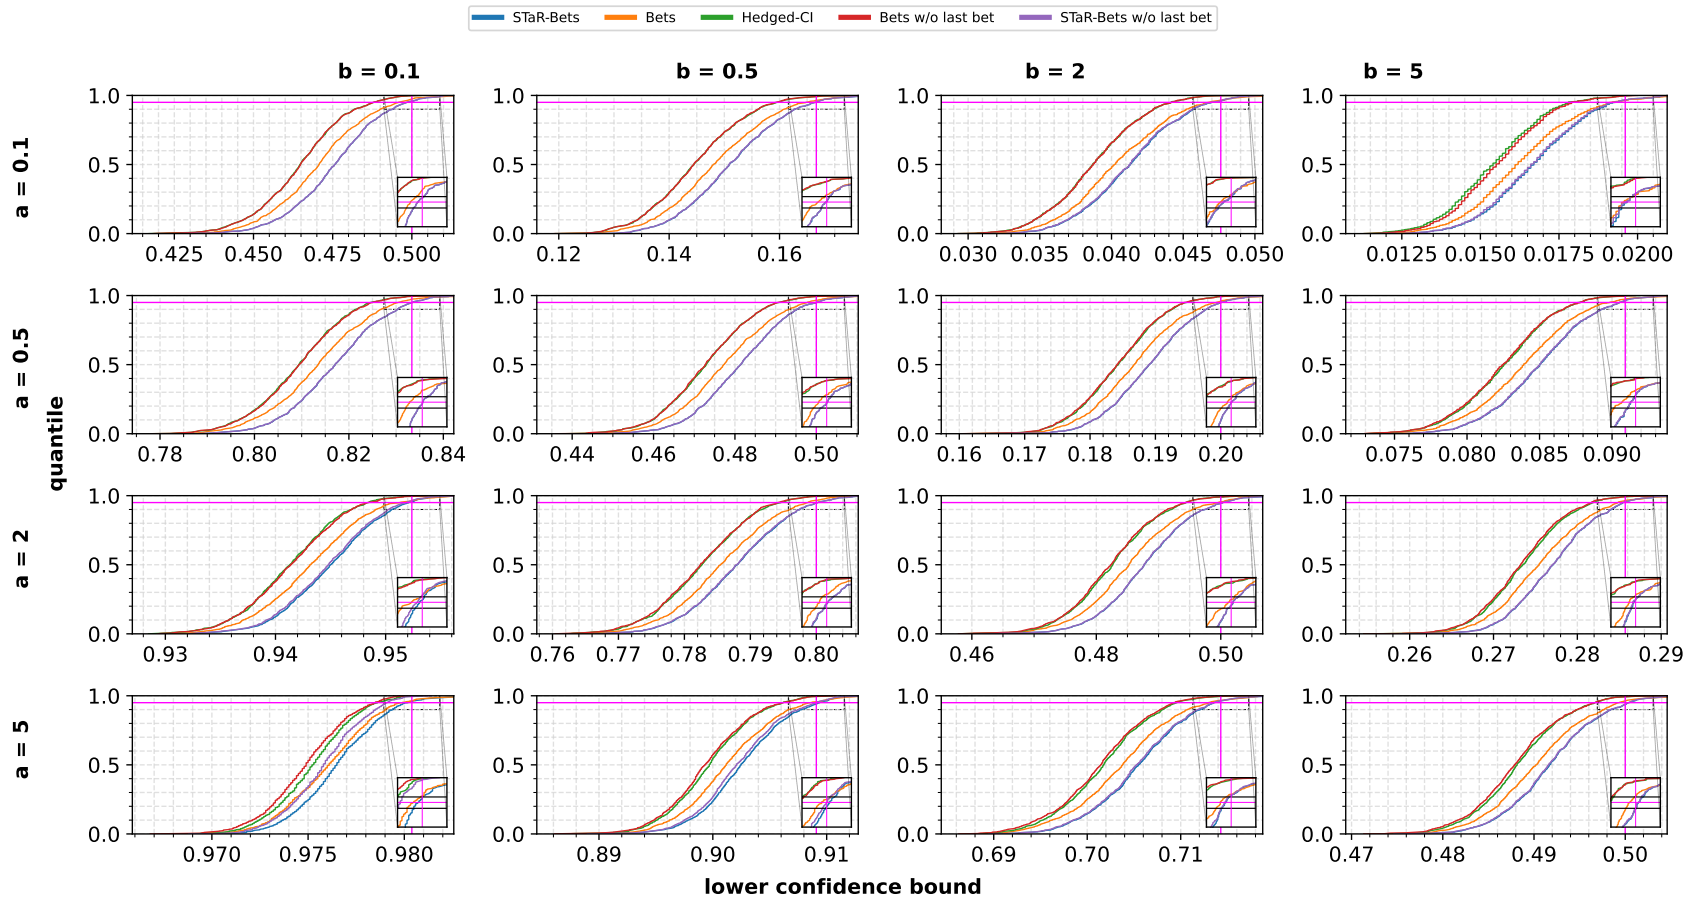

## 523 **C.5 Variance of the confidence interval with data shuffling**

524 While the majority of confidence intervals are independent of the data order, it is not the case for the  
525 betting based one. Here, we present several experiments where for every setting, the corresponding  
526 sample of random variables was obtained and then it was only shuffled for all the 1000 experiments.  
527 Note that here the coverage is meaningless, as we do not draw fresh samples.

Bernoulli,  $\delta = 0.05$ , averaged over 1000 runs

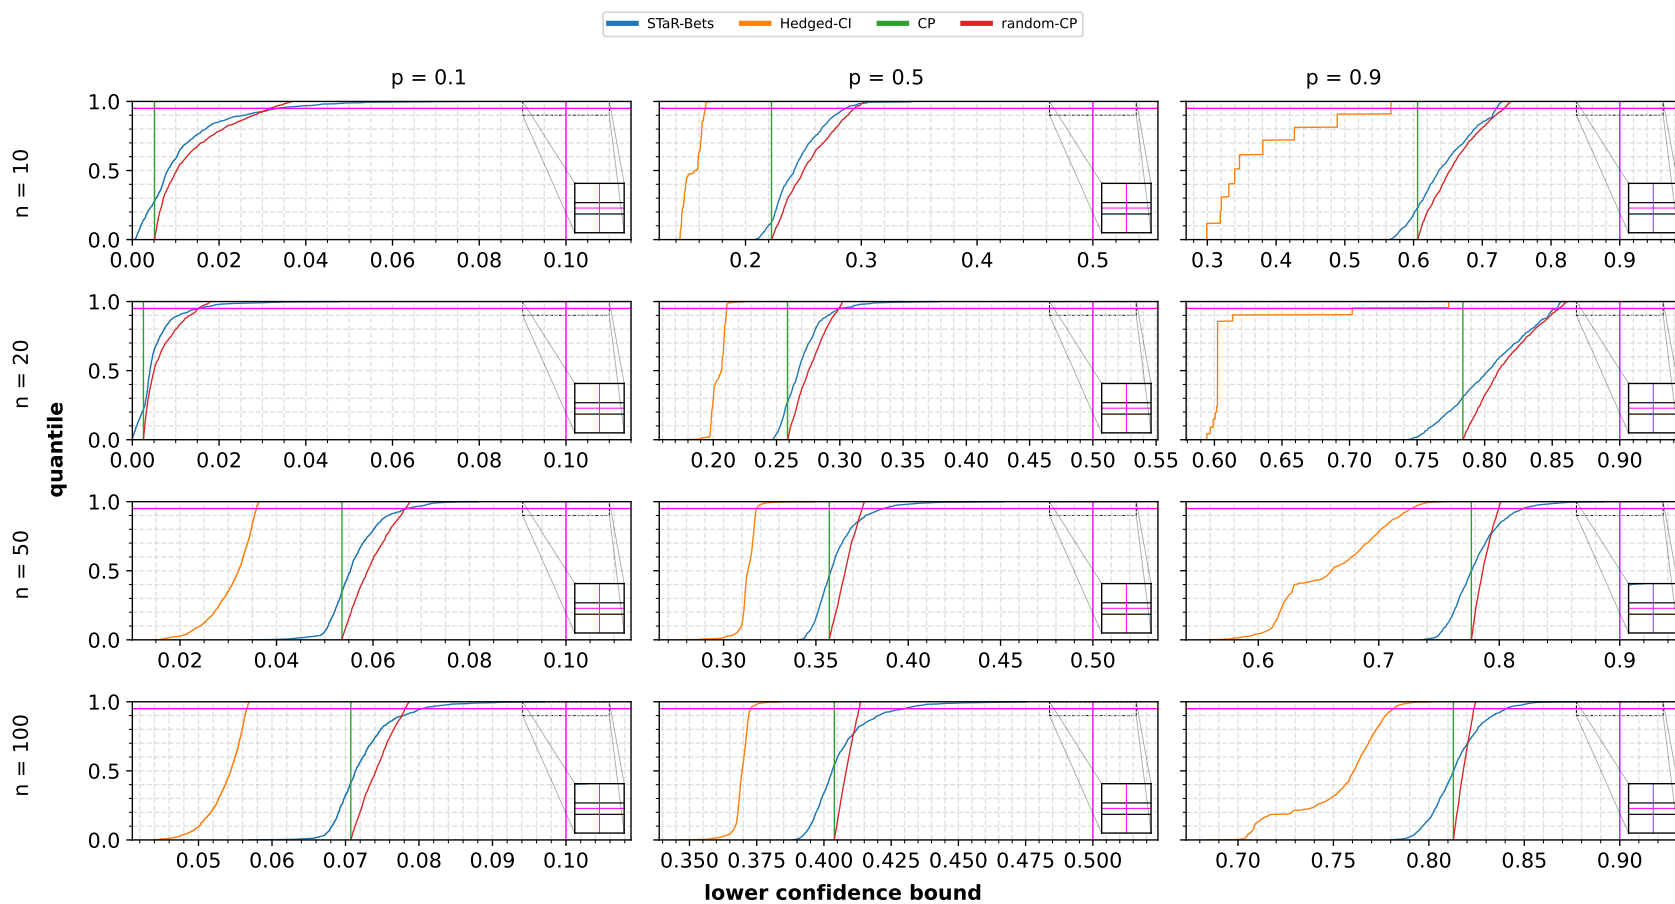

Beta, n = 50, delta = 0.05, averaged over 1000 runs

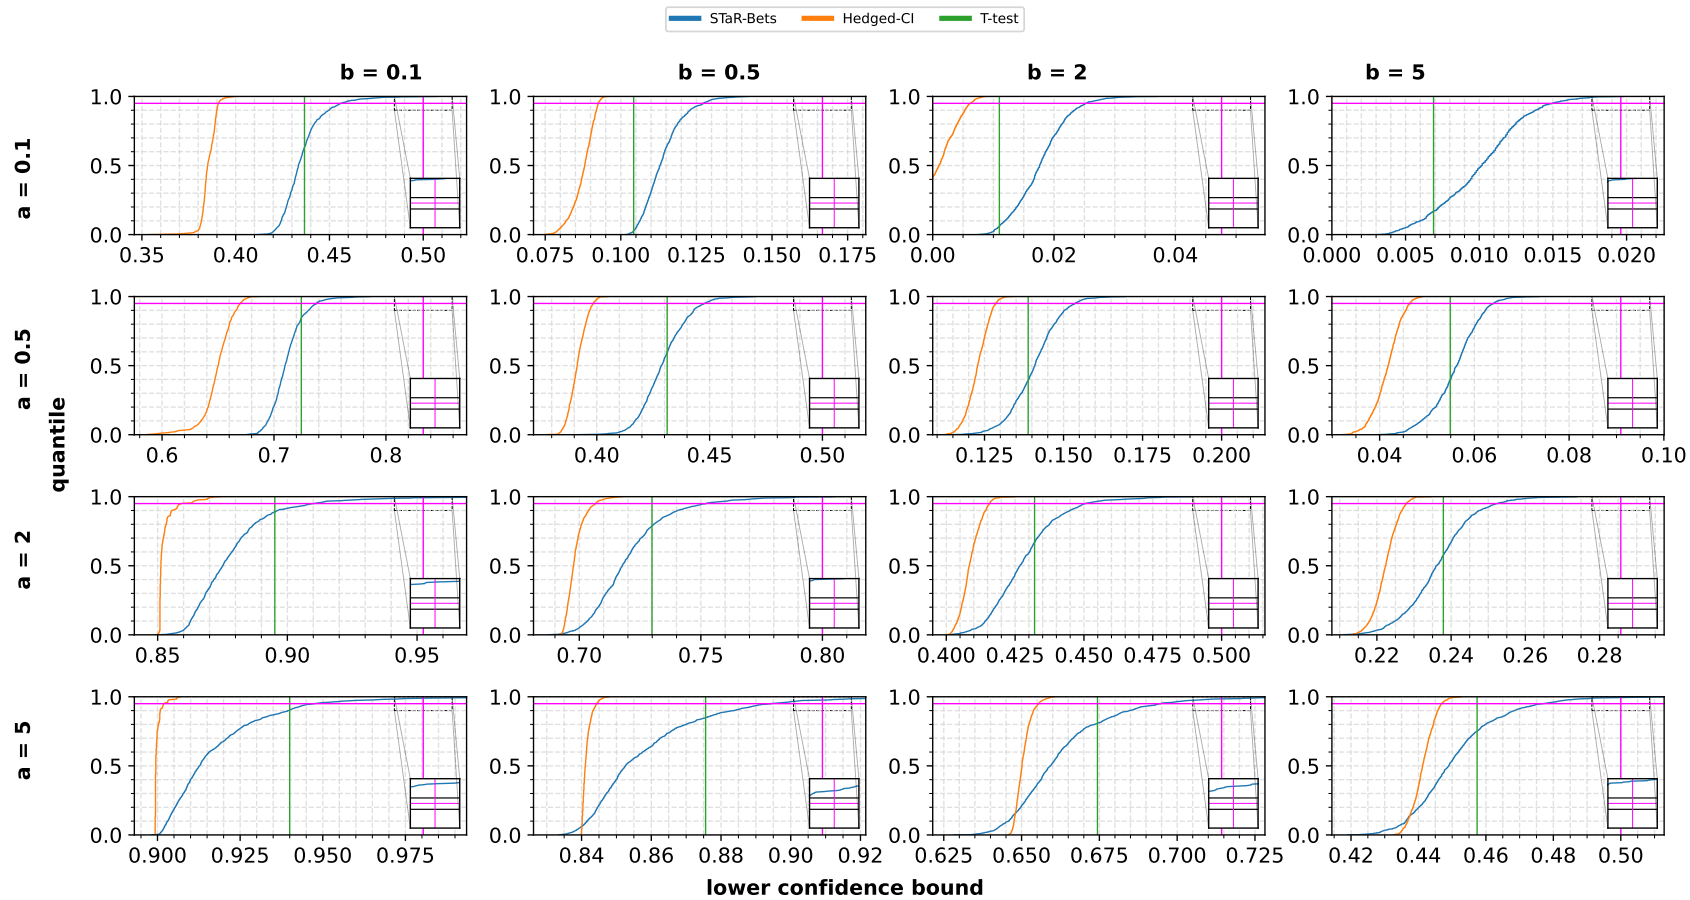

## 530 D Implementation details

531 There are certain aspects where the algorithm we implemented deviates from the vanilla version in  
532 Algorithm 3, but the underlying process is still a Test process, so the resulting confidence intervals  
533 are valid. Namely:

### 534 D.1 Clipping

535 Instead of clipping the estimate of  $\mathbb{E}[(X - m)^2]$  to its upper bound  $\max\{m^2, (1 - m)^2\}$ , we clip  
536 it to  $m(1 - m)$  instead. It would be the maximal value of  $\mathbb{E}[(X - m)^2]$  if  $m = \mathbb{E}[X]$ . The testing  
537 problem is hard when  $m \approx \mathbb{E}[X]$  (and easy otherwise), so this way, we help the algorithm on the  
538 hard values of  $m$  and hurt it on the easy ones, yielding better empirical performance.

### 539 D.2 Last round randomization

540 Just as the conservativeness of Clopper-Pearson is fixed by randomization, we attempt similar thing  
541 in the betting games.<sup>4</sup> After finishing the testing procedure, we end up with wealth  $W$ . Then we  
542 draw a uniform random variable  $U$  supported in  $[0, 1]$ ; if  $W \geq U/\delta$ , we set it to  $\frac{1}{\delta}$ . Otherwise, we  
543 set it to 0. It is easy to see that after this manipulation,  $W$  is still a test-variable, since it is still  
544 non-negative and its expectation did not increase. The effect of this is usually small for  $\star$ -Bets, since  
545 it is encouraged by design to end up with  $1/\delta$  or no wealth. The exceptions are instances with small  
546  $n$ , small variance, or instances with  $\mathbb{E}[X] \sim 1$ , in which cases the bets has to be very small, and so  
547 it is not easy to properly adapt the betting strategy and ensure that we bet aggressively enough if  
548 needed. See Appendix C.4 for experiments.

### 549 D.3 Choice of second moment estimator

550 Algorithms 3, 4 have a hyperparameter  $\alpha$  corresponding to the lower bound of probability of having  
551 short intervals in proofs. It influences how conservative we should be in estimating  $\mathbb{E}[(X - m)^2]$ . We  
552 have (empirically) observed that the larger  $m$  is, the more conservative we should be. The intuition is  
553 that our win (or loss)  $\ell(X - m)$  can be as low as  $-\ell m$ , and so with larger  $m$ , we should be more  
554 careful about the choice of  $\ell$ . We instantiate the  $10 \log \frac{8}{\alpha} n / (t - 1)^2$  term as  $cmn / (t - 1)^2$  with  $c = 1$ .  
555 In Appendix C.3 we provide experiments suggesting that the exact choice of  $c$  is not that crucial, but  
556 a proper argument about how should  $c$  depend on  $m$  is not given.

---

<sup>4</sup>The resulting random variable is known as all-or-nothing random variable, see <https://www.stat.cmu.edu/~aramdas/ebook-final.pdf>

## NeurIPS Paper Checklist

The checklist is designed to encourage best practices for responsible machine learning research, addressing issues of reproducibility, transparency, research ethics, and societal impact. Do not remove the checklist: **The papers not including the checklist will be desk rejected.** The checklist should follow the references and follow the (optional) supplemental material. The checklist does NOT count towards the page limit.

Please read the checklist guidelines carefully for information on how to answer these questions. For each question in the checklist:

- You should answer [Yes], [No], or [NA].
- [NA] means either that the question is Not Applicable for that particular paper or the relevant information is Not Available.
- Please provide a short (1–2 sentence) justification right after your answer (even for NA).

**The checklist answers are an integral part of your paper submission.** They are visible to the reviewers, area chairs, senior area chairs, and ethics reviewers. You will be asked to also include it (after eventual revisions) with the final version of your paper, and its final version will be published with the paper.

The reviewers of your paper will be asked to use the checklist as one of the factors in their evaluation. While "[Yes]" is generally preferable to "[No]", it is perfectly acceptable to answer "[No]" provided a proper justification is given (e.g., "error bars are not reported because it would be too computationally expensive" or "we were unable to find the license for the dataset we used"). In general, answering "[No]" or "[NA]" is not grounds for rejection. While the questions are phrased in a binary way, we acknowledge that the true answer is often more nuanced, so please just use your best judgment and write a justification to elaborate. All supporting evidence can appear either in the main paper or the supplemental material, provided in appendix. If you answer [Yes] to a question, in the justification please point to the section(s) where related material for the question can be found.

IMPORTANT, please:

- **Delete this instruction block, but keep the section heading “NeurIPS Paper Checklist”,**
- **Keep the checklist subsection headings, questions/answers and guidelines below.**
- **Do not modify the questions and only use the provided macros for your answers.**

### 1. Claims

Question: Do the main claims made in the abstract and introduction accurately reflect the paper’s contributions and scope?

Answer: [Yes]

Justification: Yes, we do provide an algorithm and prove some properties.

Guidelines:

- The answer NA means that the abstract and introduction do not include the claims made in the paper.
- The abstract and/or introduction should clearly state the claims made, including the contributions made in the paper and important assumptions and limitations. A No or NA answer to this question will not be perceived well by the reviewers.
- The claims made should match theoretical and experimental results, and reflect how much the results can be expected to generalize to other settings.
- It is fine to include aspirational goals as motivation as long as it is clear that these goals are not attained by the paper.

### 2. Limitations

Question: Does the paper discuss the limitations of the work performed by the authors?

Answer: [NA]

Justification: Well, we wanted to provide a confidence interval for bounded random variables and we did so.

Guidelines:

- The answer NA means that the paper has no limitation while the answer No means that the paper has limitations, but those are not discussed in the paper.
- The authors are encouraged to create a separate "Limitations" section in their paper.
- The paper should point out any strong assumptions and how robust the results are to violations of these assumptions (e.g., independence assumptions, noiseless settings, model well-specification, asymptotic approximations only holding locally). The authors should reflect on how these assumptions might be violated in practice and what the implications would be.
- The authors should reflect on the scope of the claims made, e.g., if the approach was only tested on a few datasets or with a few runs. In general, empirical results often depend on implicit assumptions, which should be articulated.
- The authors should reflect on the factors that influence the performance of the approach. For example, a facial recognition algorithm may perform poorly when image resolution is low or images are taken in low lighting. Or a speech-to-text system might not be used reliably to provide closed captions for online lectures because it fails to handle technical jargon.
- The authors should discuss the computational efficiency of the proposed algorithms and how they scale with dataset size.
- If applicable, the authors should discuss possible limitations of their approach to address problems of privacy and fairness.
- While the authors might fear that complete honesty about limitations might be used by reviewers as grounds for rejection, a worse outcome might be that reviewers discover limitations that aren't acknowledged in the paper. The authors should use their best judgment and recognize that individual actions in favor of transparency play an important role in developing norms that preserve the integrity of the community. Reviewers will be specifically instructed to not penalize honesty concerning limitations.

### 3. Theory assumptions and proofs

Question: For each theoretical result, does the paper provide the full set of assumptions and a complete (and correct) proof?

Answer: [\[Yes\]](#)

Justification: Assumptions are present, the proofs are ready and will be submitted with supplement.

Guidelines:

- The answer NA means that the paper does not include theoretical results.
- All the theorems, formulas, and proofs in the paper should be numbered and cross-referenced.
- All assumptions should be clearly stated or referenced in the statement of any theorems.
- The proofs can either appear in the main paper or the supplemental material, but if they appear in the supplemental material, the authors are encouraged to provide a short proof sketch to provide intuition.
- Inversely, any informal proof provided in the core of the paper should be complemented by formal proofs provided in appendix or supplemental material.
- Theorems and Lemmas that the proof relies upon should be properly referenced.

### 4. Experimental result reproducibility

Question: Does the paper fully disclose all the information needed to reproduce the main experimental results of the paper to the extent that it affects the main claims and/or conclusions of the paper (regardless of whether the code and data are provided or not)?

Answer: [\[Yes\]](#)

Justification: it will be in supplement.

Guidelines:

- The answer NA means that the paper does not include experiments.

- If the paper includes experiments, a No answer to this question will not be perceived well by the reviewers: Making the paper reproducible is important, regardless of whether the code and data are provided or not.
- If the contribution is a dataset and/or model, the authors should describe the steps taken to make their results reproducible or verifiable.
- Depending on the contribution, reproducibility can be accomplished in various ways. For example, if the contribution is a novel architecture, describing the architecture fully might suffice, or if the contribution is a specific model and empirical evaluation, it may be necessary to either make it possible for others to replicate the model with the same dataset, or provide access to the model. In general, releasing code and data is often one good way to accomplish this, but reproducibility can also be provided via detailed instructions for how to replicate the results, access to a hosted model (e.g., in the case of a large language model), releasing of a model checkpoint, or other means that are appropriate to the research performed.
- While NeurIPS does not require releasing code, the conference does require all submissions to provide some reasonable avenue for reproducibility, which may depend on the nature of the contribution. For example
  - (a) If the contribution is primarily a new algorithm, the paper should make it clear how to reproduce that algorithm.
  - (b) If the contribution is primarily a new model architecture, the paper should describe the architecture clearly and fully.
  - (c) If the contribution is a new model (e.g., a large language model), then there should either be a way to access this model for reproducing the results or a way to reproduce the model (e.g., with an open-source dataset or instructions for how to construct the dataset).
  - (d) We recognize that reproducibility may be tricky in some cases, in which case authors are welcome to describe the particular way they provide for reproducibility. In the case of closed-source models, it may be that access to the model is limited in some way (e.g., to registered users), but it should be possible for other researchers to have some path to reproducing or verifying the results.

## 5. Open access to data and code

Question: Does the paper provide open access to the data and code, with sufficient instructions to faithfully reproduce the main experimental results, as described in supplemental material?

Answer: [Yes]

Justification: yes, is supplement.

Guidelines:

- The answer NA means that paper does not include experiments requiring code.
- Please see the NeurIPS code and data submission guidelines (<https://nips.cc/public/guides/CodeSubmissionPolicy>) for more details.
- While we encourage the release of code and data, we understand that this might not be possible, so “No” is an acceptable answer. Papers cannot be rejected simply for not including code, unless this is central to the contribution (e.g., for a new open-source benchmark).
- The instructions should contain the exact command and environment needed to run to reproduce the results. See the NeurIPS code and data submission guidelines (<https://nips.cc/public/guides/CodeSubmissionPolicy>) for more details.
- The authors should provide instructions on data access and preparation, including how to access the raw data, preprocessed data, intermediate data, and generated data, etc.
- The authors should provide scripts to reproduce all experimental results for the new proposed method and baselines. If only a subset of experiments are reproducible, they should state which ones are omitted from the script and why.
- At submission time, to preserve anonymity, the authors should release anonymized versions (if applicable).



- Providing as much information as possible in supplemental material (appended to the paper) is recommended, but including URLs to data and code is permitted.

## 6. Experimental setting/details

Question: Does the paper specify all the training and test details (e.g., data splits, hyper-parameters, how they were chosen, type of optimizer, etc.) necessary to understand the results?

Answer: [NA]

Justification: no training in the paper.

Guidelines:

- The answer NA means that the paper does not include experiments.
- The experimental setting should be presented in the core of the paper to a level of detail that is necessary to appreciate the results and make sense of them.
- The full details can be provided either with the code, in appendix, or as supplemental material.

## 7. Experiment statistical significance

Question: Does the paper report error bars suitably and correctly defined or other appropriate information about the statistical significance of the experiments?

Answer: [Yes]

Justification: yes, we derive confidence intervals and we are disgusted that you explicitly say that 1-sigma error is 96% CI.

Guidelines:

- The answer NA means that the paper does not include experiments.
- The authors should answer "Yes" if the results are accompanied by error bars, confidence intervals, or statistical significance tests, at least for the experiments that support the main claims of the paper.
- The factors of variability that the error bars are capturing should be clearly stated (for example, train/test split, initialization, random drawing of some parameter, or overall run with given experimental conditions).
- The method for calculating the error bars should be explained (closed form formula, call to a library function, bootstrap, etc.)
- The assumptions made should be given (e.g., Normally distributed errors).
- It should be clear whether the error bar is the standard deviation or the standard error of the mean.
- It is OK to report 1-sigma error bars, but one should state it. The authors should preferably report a 2-sigma error bar than state that they have a 96% CI, if the hypothesis of Normality of errors is not verified.
- For asymmetric distributions, the authors should be careful not to show in tables or figures symmetric error bars that would yield results that are out of range (e.g. negative error rates).
- If error bars are reported in tables or plots, The authors should explain in the text how they were calculated and reference the corresponding figures or tables in the text.

## 8. Experiments compute resources

Question: For each experiment, does the paper provide sufficient information on the computer resources (type of compute workers, memory, time of execution) needed to reproduce the experiments?

Answer: [NA]

Justification: no resource intensive stuff

Guidelines:

- The answer NA means that the paper does not include experiments.
- The paper should indicate the type of compute workers CPU or GPU, internal cluster, or cloud provider, including relevant memory and storage.

- The paper should provide the amount of compute required for each of the individual experimental runs as well as estimate the total compute.
- The paper should disclose whether the full research project required more compute than the experiments reported in the paper (e.g., preliminary or failed experiments that didn't make it into the paper).

## 9. Code of ethics

Question: Does the research conducted in the paper conform, in every respect, with the NeurIPS Code of Ethics <https://neurips.cc/public/EthicsGuidelines?>

Answer: [Yes]

Justification: we are ethical people.

Guidelines:

- The answer NA means that the authors have not reviewed the NeurIPS Code of Ethics.
- If the authors answer No, they should explain the special circumstances that require a deviation from the Code of Ethics.
- The authors should make sure to preserve anonymity (e.g., if there is a special consideration due to laws or regulations in their jurisdiction).

## 10. Broader impacts

Question: Does the paper discuss both potential positive societal impacts and negative societal impacts of the work performed?

Answer: [NA]

Justification: come on, we derive confidence intervals.

Guidelines:

- The answer NA means that there is no societal impact of the work performed.
- If the authors answer NA or No, they should explain why their work has no societal impact or why the paper does not address societal impact.
- Examples of negative societal impacts include potential malicious or unintended uses (e.g., disinformation, generating fake profiles, surveillance), fairness considerations (e.g., deployment of technologies that could make decisions that unfairly impact specific groups), privacy considerations, and security considerations.
- The conference expects that many papers will be foundational research and not tied to particular applications, let alone deployments. However, if there is a direct path to any negative applications, the authors should point it out. For example, it is legitimate to point out that an improvement in the quality of generative models could be used to generate deepfakes for disinformation. On the other hand, it is not needed to point out that a generic algorithm for optimizing neural networks could enable people to train models that generate Deepfakes faster.
- The authors should consider possible harms that could arise when the technology is being used as intended and functioning correctly, harms that could arise when the technology is being used as intended but gives incorrect results, and harms following from (intentional or unintentional) misuse of the technology.
- If there are negative societal impacts, the authors could also discuss possible mitigation strategies (e.g., gated release of models, providing defenses in addition to attacks, mechanisms for monitoring misuse, mechanisms to monitor how a system learns from feedback over time, improving the efficiency and accessibility of ML).

## 11. Safeguards

Question: Does the paper describe safeguards that have been put in place for responsible release of data or models that have a high risk for misuse (e.g., pretrained language models, image generators, or scraped datasets)?

Answer: [NA]

Justification: no, we would like people to use our confidence intervals.

Guidelines:

- The answer NA means that the paper poses no such risks.

- Released models that have a high risk for misuse or dual-use should be released with necessary safeguards to allow for controlled use of the model, for example by requiring that users adhere to usage guidelines or restrictions to access the model or implementing safety filters.
- Datasets that have been scraped from the Internet could pose safety risks. The authors should describe how they avoided releasing unsafe images.
- We recognize that providing effective safeguards is challenging, and many papers do not require this, but we encourage authors to take this into account and make a best faith effort.

## 12. Licenses for existing assets

Question: Are the creators or original owners of assets (e.g., code, data, models), used in the paper, properly credited and are the license and terms of use explicitly mentioned and properly respected?

Answer: [NA]

Justification: no assets.

Guidelines:

- The answer NA means that the paper does not use existing assets.
- The authors should cite the original paper that produced the code package or dataset.
- The authors should state which version of the asset is used and, if possible, include a URL.
- The name of the license (e.g., CC-BY 4.0) should be included for each asset.
- For scraped data from a particular source (e.g., website), the copyright and terms of service of that source should be provided.
- If assets are released, the license, copyright information, and terms of use in the package should be provided. For popular datasets, [paperswithcode.com/datasets](https://paperswithcode.com/datasets) has curated licenses for some datasets. Their licensing guide can help determine the license of a dataset.
- For existing datasets that are re-packaged, both the original license and the license of the derived asset (if it has changed) should be provided.
- If this information is not available online, the authors are encouraged to reach out to the asset's creators.

## 13. New assets

Question: Are new assets introduced in the paper well documented and is the documentation provided alongside the assets?

Answer: [NA]

Justification: no

Guidelines:

- The answer NA means that the paper does not release new assets.
- Researchers should communicate the details of the dataset/code/model as part of their submissions via structured templates. This includes details about training, license, limitations, etc.
- The paper should discuss whether and how consent was obtained from people whose asset is used.
- At submission time, remember to anonymize your assets (if applicable). You can either create an anonymized URL or include an anonymized zip file.

## 14. Crowdsourcing and research with human subjects

Question: For crowdsourcing experiments and research with human subjects, does the paper include the full text of instructions given to participants and screenshots, if applicable, as well as details about compensation (if any)?

Answer: [NA]

Justification: no crowds

Guidelines:

- The answer NA means that the paper does not involve crowdsourcing nor research with human subjects.
- Including this information in the supplemental material is fine, but if the main contribution of the paper involves human subjects, then as much detail as possible should be included in the main paper.
- According to the NeurIPS Code of Ethics, workers involved in data collection, curation, or other labor should be paid at least the minimum wage in the country of the data collector.

#### 15. Institutional review board (IRB) approvals or equivalent for research with human subjects

Question: Does the paper describe potential risks incurred by study participants, whether such risks were disclosed to the subjects, and whether Institutional Review Board (IRB) approvals (or an equivalent approval/review based on the requirements of your country or institution) were obtained?

Answer: [NA]

Justification: we really do just confidence intervals.

Guidelines:

- The answer NA means that the paper does not involve crowdsourcing nor research with human subjects.
- Depending on the country in which research is conducted, IRB approval (or equivalent) may be required for any human subjects research. If you obtained IRB approval, you should clearly state this in the paper.
- We recognize that the procedures for this may vary significantly between institutions and locations, and we expect authors to adhere to the NeurIPS Code of Ethics and the guidelines for their institution.
- For initial submissions, do not include any information that would break anonymity (if applicable), such as the institution conducting the review.

#### 16. Declaration of LLM usage

Question: Does the paper describe the usage of LLMs if it is an important, original, or non-standard component of the core methods in this research? Note that if the LLM is used only for writing, editing, or formatting purposes and does not impact the core methodology, scientific rigorousness, or originality of the research, declaration is not required.

Answer: [NA]

Justification: nothing to discuss.

Guidelines:

- The answer NA means that the core method development in this research does not involve LLMs as any important, original, or non-standard components.
- Please refer to our LLM policy (<https://neurips.cc/Conferences/2025/LLM>) for what should or should not be described.
